# Supplementary material for: Nutrition Knowledge is Correlated with a Better Dietary Intake in Adolescent Soccer Players: A Cross-Sectional Study
Source: Hindawi journal article supplement (doi:10.1155/2020/3519781), 2020-01-04
Supplement: f1 [file 3519781.f1.pdf]

| NOME        | numero_m | GÊNERO | TANNER | Classificaçã | Pubere_ou | FAIXA_ETÁ | PESO | ALTURA |      |
|-------------|----------|--------|--------|--------------|-----------|-----------|------|--------|------|
| L.E         | 5        |        | 1      | 4            | 2         | 1         | 17   | 65.3   | 1.77 |
| L.C         | 4.666667 |        | 1      | 5            | 5         | 2         | 17   | 82     | 1.94 |
| R.A         | 3.333333 |        | 1      | 2            | 2         | 1         | 16   | 73.2   | 1.75 |
| J.P         | 3        |        | 1      | 3            | 2         | 1         | 15   | 59.8   | 1.72 |
| Eugenio He  | 3        |        | 1      | 5            | 5         | 2         | 17   | 78     | 1.85 |
| Olavo Sant  | 3        |        | 1      | 4            | 2         | 1         | 19   | 64.1   | 1.74 |
| Helio Alves | 3        |        | 1      | 4            | 2         | 1         | 16   | 62.6   | 1.7  |
| V.S         | 2.666667 |        | 1      | 3            | 2         | 1         | 17   | 67     | 1.84 |
| N.R.S       | 6        |        | 1      | 5            | 5         | 2         | 18   | 73.2   | 1.78 |
| M.W         | 6        |        | 1      | 4            | 2         | 1         | 17   | 70.4   | 1.75 |
| T.A         | 5        |        | 1      | 4            | 2         | 1         | 15   | 56.8   | 1.74 |
| REGINALDC   | 4.666667 |        | 1      | 2            | 2         | 1         | 14   | 54.9   | 2    |
| R.I         | 4.666667 |        | 1      | 4            | 2         | 1         | 19   | 59.3   | 1.74 |
| Caio Freita | 4.666667 |        | 1      | #NULL!       | 2         | 1         | 16   | 67.2   | 1.76 |
| JUAN        | 4.333333 |        | 1      | 3            | 2         | 1         | 16   | 70.3   | 2    |
| ADRIANO C   | 4.333333 |        | 1      | 5            | 5         | 2         | 19   | 66.8   | 1.75 |
| A.R.S.      | 4.333333 |        | 1      | 3            | 2         | 1         | 16   | 63.3   | 1.73 |
| IGOR DA CF  | 4        |        | 1      | 4            | 2         | 1         | 17   | 67.4   | 2    |
| W.M         | 4        |        | 1      | 4            | 2         | 1         | 19   | 68.3   | 1.73 |
| A.J         | 4        |        | 1      | 4            | 2         | 1         | 18   | 59.2   | 1.75 |
| GUILHERM    | 4        |        | 1      | 5            | 5         | 2         | 20   | 70     | 1.74 |
| L.N.J.      | 4        |        | 1      | 4            | 2         | 1         | 17   | 60.5   | 1.79 |
| CAIQUE DE   | 4        |        | 1      | 4            | 2         | 1         | 17   | 67.2   | 1.79 |
| ANDRE OLI   | 4        |        | 1      | 5            | 5         | 2         | 17   | 64.4   | 1.69 |
| WANDERSC    | 4        |        | 1      | 3            | 2         | 1         | 18   | 64.1   | 1.73 |
| ROMARIO /   | 3.666667 |        | 1      | 4            | 2         | 1         | 18   | 61.8   | 1.79 |
| LEANDRO I   | 3.333333 |        | 1      | 5            | 5         | 2         | 16   | 57.7   | 1.69 |
| JOSSUEL F.  | 3        |        | 1      | 3            | 2         | 1         | 18   | 64.2   | 2    |
| CARLOS CE   | 3        |        | 1      | 1            | 1         | 1         | 17   | 54.8   | 2    |
| EMERSON :   | 3        |        | 1      | 2            | 2         | 1         | 18   | 61.6   | 2    |
| J.V         | 3        |        | 1      | 4            | 2         | 1         | 15   | 61.4   | 1.69 |
| R.S         | 3        |        | 1      | 2            | 2         | 1         | 14   | 56.6   | 1.68 |
| Mateus Co:  | 3        |        | 1      | 4            | 2         | 1         | 19   | 76.8   | 1.79 |
| Thiago da S | 3        |        | 1      | 9            | 5         | 2         | 18   | 71.4   | 1.78 |
| Maxsuel Je  | 3        |        | 1      | 9            | 5         | 2         | 17   | 74     | 1.79 |
| EVANIO DC   | 3        |        | 1      | 3            | 2         | 1         | 16   | 56.6   | 1.76 |
| JACKSON M   | 3        |        | 1      | 3            | 2         | 1         | 16   | 57.4   | 1.69 |
| L.O.        | 3        |        | 1      | 4            | 2         | 1         | 17   | 82.1   | 1.86 |
| R.V.        | 3        |        | 1      | 5            | 5         | 2         | 19   | 75.3   | 1.79 |
| E.F         | 2.666667 |        | 1      | 4            | 2         | 1         | 16   | 62.1   | 1.73 |
| E.C         | 6        |        | 1      | 5            | 5         | 2         | 18   | 84.4   | 1.81 |
| A.V         | 5.666667 |        | 1      | 1            | 1         | 1         | 17   | 61.1   | 1.76 |
| D.A         | 4.666667 |        | 1      | 3            | 2         | 1         | 18   | 68.7   | 1.87 |
| J.C.S.A.    | 4.333333 |        | 1      | 4            | 2         | 1         | 18   | 61.1   | 1.82 |
| MATHEUS I   | 4        |        | 1      | 5            | 5         | 2         | 19   | 74.6   | 1.78 |
| IAGO DOS :  | 4        |        | 1      | 3            | 2         | 1         | 18   | 68.4   | 1.79 |

|             |          |   |   |   |   |    |      |      |
|-------------|----------|---|---|---|---|----|------|------|
| Y.R         | 3.666667 | 1 | 4 | 2 | 1 | 16 | 67.5 | 1.69 |
| RANYERES    | 3.666667 | 1 | 5 | 5 | 2 | 16 | 84.5 | 1.83 |
| ANDERSON    | 3        | 1 | 3 | 2 | 1 | 16 | 57.5 | 2    |
| ADONES S.   | 3        | 1 | 2 | 2 | 1 | 18 | 69   | 2    |
| GUSTAVO J   | 3        | 1 | 3 | 2 | 1 | 17 | 60.2 | 2    |
| S.H         | 3        | 1 | 4 | 2 | 1 | 16 | 74.1 | 1.7  |
| HUDSON B.   | 3        | 1 | 4 | 2 | 1 | 16 | 52.8 | 1.74 |
| IGOR FARIÁ  | 3        | 1 | 4 | 2 | 1 | 16 | 68.6 | 1.78 |
| B.B.W       | 3        | 1 | 4 | 2 | 1 | 19 | 79.9 | 1.76 |
| F.W         | 5        | 1 | 4 | 2 | 1 | 17 | 63.3 | 1.82 |
| Felipe Gom  | 5        | 1 | 5 | 5 | 2 | 19 | 67.2 | 1.76 |
| JOSE RICAR  | 3.666667 | 1 | 2 | 2 | 1 | 16 | 56.6 | 2    |
| ALDO        | 3.666667 | 1 | 4 | 2 | 1 | 18 | 64.5 | 2    |
| JOAO VICTO  | 3.666667 | 1 | 2 | 2 | 1 | 17 | 64   | 2    |
| Erick Andre | 3.666667 | 1 | 3 | 2 | 1 | 17 | 62.6 | 1.75 |
| ADERLAN C   | 3.333333 | 1 | 5 | 5 | 2 | 15 | 75.2 | 2    |
| V.L         | 3.333333 | 1 | 5 | 5 | 2 | 18 | 67.8 | 1.75 |
| P.H         | 3.333333 | 1 | 4 | 2 | 1 | 16 | 78.1 | 1.76 |
| J.C.M.      | 3.333333 | 1 | 4 | 2 | 1 | 17 | 58.3 | 1.68 |
| YURE WENI   | 3        | 1 | 3 | 2 | 1 | 17 | 60.6 | 2    |
| L.A         | 3        | 1 | 3 | 2 | 1 | 17 | 65.8 | 1.76 |
| GERÔNIMC    | 3        | 1 | 4 | 2 | 1 | 19 | 66.4 | 1.84 |
| GERSON LE   | 4        | 1 | 4 | 2 | 1 | 18 | 65.4 | 2    |
| JOAO VITO   | 3.666667 | 1 | 4 | 2 | 1 | 14 | 54   | 2    |
| PEDRO HEM   | 3.666667 | 1 | 5 | 5 | 2 | 18 | 72.2 | 2    |
| FLAVIO S V. | 3        | 1 | 2 | 2 | 1 | 17 | 71.2 | 2    |
| ALEANDRO    | 3        | 1 | 3 | 2 | 1 | 15 | 75.9 | 2    |

| @_GORD | MAS_MAG | MAS_GOR     | IMC   | CHO_KG   | Perc_carbo | ADQ_CARB | MÉDIA_A  | PTN_kg   |
|--------|---------|-------------|-------|----------|------------|----------|----------|----------|
| 13.91  | 56.21   | 9.08        | 20.84 | 3.12144  | 71.07043   | 3        | 36.08    | 0.552527 |
| 10.85  | 73.1    | 8.89        | 21.79 | 6.442308 | 72.967     | 3        | 55.52    | 0.677073 |
| 16.43  | 61.17   | 12.02       | 23.9  | 1.508333 | 47.71563   | 3        | 56.79667 | 0.775911 |
| 11.77  | 52.75   | 7.04        | 20.21 | 1.898829 | 22.75289   | 3        | 54.67    | 0.914214 |
| 6.63   | 72.82   | 5.1752      | 22.79 | 3.2738   | 51.16845   | 3        | 159.795  | 2.05     |
| 8.53   | 58.63   | 5.4659      | 21.17 | 2.6171   | 42.66895   | 3        | 68.193   | 1.06     |
| 8.84   | 57.06   | 5.5329      | 21.66 | 3.4702   | 36.02864   | 3        | 96.48    | 1.54     |
| 11.28  | 59.44   | 7.55        | 19.79 | 2.012836 | 18.4938    | 3        | 50.66    | 0.756119 |
| 12.76  | 63.86   | 9.33        | 23.1  | 4.519536 | 55.9998    | 3        | 102.575  | 1.401298 |
| 19.35  | 56.77   | 13.62       | 22.99 | 4.651207 | 63.36393   | 3        | 73.145   | 1.038991 |
| 9.35   | 51.48   | 5.31        | 18.76 | 4.28794  | 59.33275   | 3        | 101.235  | 1.782306 |
| 9.7    | 49.58   | 5           | 20    | 6.29     | 52         | 1        | 119      | 2.17     |
| 9.97   | 53.38   | 5.91        | 19.59 | 2.72552  | 45.50356   | 3        | 124.28   | 2.095784 |
| 14.5   | 57.46   | 9.74 #NULL! |       | 4.69     | 106.5323   | 3        | 183.9333 | 2.73     |
| 15.79  | 59.2    | 11          | 23    | 7.1      | 56         | 2        | 121      | 1.73     |
| 14.6   | 47.04   | 9.75        | 21.57 | 4.92     | 61.96065   | 3        | 87.97    | 1.31     |
| 19.2   | 51.14   | 12.15       | 21.15 | 7.01     | 61.45221   | 1        | 74.94667 | 1.18     |
| 12.1   | 59.24   | 8           | 23    | 3.31     | 54         | 3        | 77       | 1.14     |
| 13.43  | 59.12   | 9.17        | 22.82 | 3.27694  | 57.89598   | 3        | 115.82   | 1.695754 |
| 7.9    | 54.52   | 4.67        | 19.33 | 5.445355 | 53.46497   | 1        | 76.09    | 1.285304 |
| 16.82  | 58.22   | 11.77       | 23.12 | 11.25    | 66.72566   | 2        | 187.79   | 2.68     |
| 10.98  | 53.85   | 6.64        | 18.88 | 5.61     | 57.87772   | 1        | 110.42   | 1.82     |
| 19.91  | 53.81   | 13.38       | 20.97 | 6.84     | 67.36281   | 1        | 106.26   | 1.58     |
| 12.29  | 56.48   | 7.91        | 22.55 | 3.34     | 45.73956   | 3        | 94.57    | 1.46     |
| 20.03  | 51.26   | 12.83       | 21.42 | 4.26     | 58.50615   | 3        | 85.48    | 1.33     |
| 16.79  | 51.42   | 10.37       | 19.29 | 4.45     | 50.5824    | 3        | 119.67   | 1.93     |
| 17.5   | 57.59   | 10.1        | 20.2  | 4.09     | 59.51597   | 3        | 62.33    | 1.08     |
| 14.86  | 54.66   | 10          | 24    | 3.64     | 50         | 3        | 134      | 2.08     |
| 12     | 48.92   | 7           | 21    | 4.65     | 51         | 3        | 93       | 1.69     |
| 9.46   | 55.77   | 6           | 21    | 4.08     | 48         | 3        | 102      | 1.65     |
| 17.25  | 50.81   | 10.58       | 21.5  | 2.745494 | 49.60568   | 3        | 97.09333 | 1.581325 |
| 8.53   | 51.77   | 4.82        | 20.05 | 2.645642 | 50.55139   | 3        | 85.75667 | 1.515135 |
| 8.53   | 70.25   | 6.5488      | 23.97 | 3.0565   | 60.72204   | 3        | 147.95   | 1.93     |
| 14.5   | 61      | 10.35       | 22.54 | 2.6209   | 35.82485   | 3        | 136.807  | 1.92     |
| 14.5   | 63.6    | 10.73       | 23.1  | 2.7941   | 84.80076   | 3        | 146.66   | 1.98     |
| 16.25  | 47.4    | 9.19        | 18.27 | 4.08     | 52.18      | 3        | 76.09    | 1.34     |
| 11.48  | 50.81   | 6.58        | 20.1  | 5.05     | 58.91553   | 1        | 94.28    | 1.64     |
| 24.66  | 65.63   | 16.46       | 23.73 | 2.64     | 45.55335   | 3        | 68.24    | 0.83     |
| 22.91  | 58.05   | 17.24       | 23.5  | 3.63     | 51.59448   | 3        | 23.95333 | 0.31     |
| 11.18  | 55.15   | 6.94        | 20.75 | 4.056361 | 64.0721    | 3        | 95.55333 | 1.538701 |
| 16.38  | 70.57   | 13.82       | 25.76 | 1.628495 | 50.35722   | 3        | 47.79    | 0.566232 |
| 10.64  | 54.59   | 6.5         | 19.72 | 5.38437  | 60.75439   | 1        | 82.195   | 1.345254 |
| 14.86  | 58.49   | 10.2        | 19.65 | 4.65182  | 66.50089   | 3        | 72.2     | 1.050946 |
| 19.31  | 49.29   | 11.8        | 18.45 | 4.91     | 56.64415   | 3        | 84.18667 | 1.37     |
| 17.13  | 61.82   | 12.77       | 23.55 | 4.84     | 52.47687   | 3        | 99.3     | 1.33     |
| 14.39  | 58.55   | 9.84        | 21.35 | 4.15     | 52.98776   | 3        | 129.06   | 1.88     |

|       |       |             |       |          |          |   |          |          |
|-------|-------|-------------|-------|----------|----------|---|----------|----------|
| 20.78 | 53.47 | 14.02       | 23.63 | 2.594296 | 54.40466 | 3 | 63.825   | 0.945556 |
| 20.94 | 66.8  | 17.69       | 25.23 | 3.39     | 44.9486  | 3 | 127.7    | 1.51     |
| 8.11  | 52.83 | 5           | 19    | 4.3      | 55       | 3 | 67       | 1.16     |
| 14    | 59.34 | 10          | 21    | 3.49     | 41       | 3 | 146      | 2.12     |
| 16.06 | 50.53 | 10          | 19    | 3.67     | 52       | 3 | 87       | 1.44     |
| 18.04 | 60.73 | 13.36       | 25.64 | 7.983857 | 53.4951  | 3 | 99.63    | 1.344534 |
| 10.07 | 47.48 | 5.31        | 17.44 | 3.38     | 58.27824 | 3 | 50.01    | 0.94     |
| 16.25 | 57.45 | 11.14       | 21.65 | 4.53     | 74.91336 | 3 | 37.27    | 0.54     |
| 30.42 | 55.59 | 24.3        | 25.79 | 2.32     | 61.66089 | 3 | 49.90667 | 0.62     |
| 8.53  | 57.9  | 5.397       | 19.11 | 6.621564 | 57.47874 | 1 | 85.005   | 1.342891 |
| 14.5  | 57.46 | 9.74 #NULL! |       | 5.06     | 83.01705 | 1 | 213.677  | 3.17     |
| 11.38 | 50.16 | 6           | 20    | 5.57     | 58       | 1 | 98       | 1.74     |
| 8.42  | 59.06 | 5           | 22    | 3.31     | 55       | 3 | 71       | 1.11     |
| 10.1  | 57.53 | 6           | 20    | 4.12     | 47       | 3 | 92       | 1.43     |
| 8.94  | 57    | 5.5976      | 20.44 | 3.8925   | 71.7042  | 3 | 94.96    | 1.52     |
| 18.73 | 61.11 | 14          | 26    | 3.35     | 60       | 3 | 78       | 1.03     |
| 12.76 | 59.15 | 8.64        | 22.14 | 2.632375 | 65.72243 | 3 | 54.71    | 0.806932 |
| 19.94 | 62.52 | 15.57       | 25.21 | 1.829257 | 58.59385 | 3 | 62.595   | 0.801472 |
| 9.55  | 52.73 | 5.56        | 20.66 | 3        | 42.23947 | 3 | 105.97   | 1.81     |
| 9.9   | 54.6  | 6           | 20    | 5.12     | 67       | 1 | 57       | 0.93     |
| 14.86 | 56.02 | 9.77        | 21.24 | 3.133359 | 60.65242 | 3 | 62.62    | 0.951672 |
| 12.46 | 58.12 | 8.27        | 19.61 | 3.7      | 58.5187  | 3 | 56.82    | 0.85     |
| 11.31 | 58    | 7           | 22    | 4.4      | 58       | 3 | 106      | 1.62     |
| 13.05 | 46.95 | 7           | 19    | 3.13     | 47       | 3 | 86       | 1.59     |
| 9.48  | 65.36 | 7           | 27    | 4.28     | 51       | 3 | 151      | 2.09     |
| 23.79 | 54.25 | 17          | 25    | 1.7      | 49       | 3 | 60       | 0.84     |
| 16.97 | 63.02 | 13          | 26    | 2.72     | 41       | 3 | 153      | 2.02     |

| Perc_PTN | ADQ_PTN | GKG_LIP  | PERCENTU,ADQ_LIP | MÉDIA_FINEAR_VITA | MÉDIA_FINEAR_B1 |   |          |   |
|----------|---------|----------|------------------|-------------------|-----------------|---|----------|---|
| 12.5802  | 3       | 0.319142 | 16.34937         | 3                 | 230.4           | 2 | 0.64     | 2 |
| 16.12389 | 3       | 0.203598 | 10.90911         | 3                 | 78              | 2 | 0.445    | 2 |
| 24.54568 | 3       | 0.389709 | 27.73868         | 1                 | 298.5           | 2 | 0.32     | 2 |
| 10.95465 | 3       | 0.985117 | 26.55957         | 1                 | 1026.3          | 1 | 0.81     | 2 |
| 32.01936 | 2       | 0.62     | 20.74            | 3                 | 257.25          | 2 | 0.87     | 2 |
| 17.34525 | 3       | 0.82     | 33.33            | 1                 | 74.9333         | 2 | 0.1933   | 2 |
| 16.00143 | 1       | 1.25     | 35.96            | 2                 | 330.8           | 2 | 1.4567   | 1 |
| 6.947173 | 3       | 0.168507 | 12.04352         | 3                 | 77.2            | 2 | 0.31     | 2 |
| 17.36293 | 1       | 0.955464 | 26.63727         | 1                 | 253.65          | 1 | 1.29     | 1 |
| 14.1543  | 3       | 0.733452 | 22.48177         | 2                 | 279.9           | 2 | 1.53     | 1 |
| 24.66199 | 1       | 0.514085 | 16.00526         | 3                 | 89              | 2 | 0.595    | 2 |
| 18       | 2       | 1.64     | 30.31            | 1                 | 533.57          | 3 | 1.6      | 1 |
| 34.98989 | 2       | 0.51928  | 19.50655         | 3                 | 101.1667        | 1 | 0.59     | 2 |
| 62.09349 | 2       | 1.18     | 26.43            | 1                 | 745.4           | 2 | 1.81     | 1 |
| 14       | 1       | 1.73     | 30.7             | 1                 | 479.3           | 3 | 2.1      | 1 |
| 16.55584 | 1       | 0.73     | 20.92            | 3                 | 11802.3         | 1 | 1.3      | 1 |
| 10.37111 | 3       | 0.95     | 18.86            | 3                 | 269.7           | 2 | 1.19     | 1 |
| 19       | 3       | 0.71     | 26.15            | 1                 | 723.5           | 3 | 1        | 1 |
| 29.96007 | 1       | 0.30549  | 12.14395         | 3                 | 224.8           | 2 | 0.77     | 2 |
| 12.6197  | 1       | 1.53522  | 33.91534         | 2                 | 409.95          | 2 | 0.88     | 2 |
| 15.90174 | 2       | 1.3      | 17.37            | 3                 | 13670.96        | 1 | 2.23     | 1 |
| 18.82063 | 1       | 1        | 23.3             | 3                 | 7481.767        | 1 | 1.576667 | 1 |
| 15.56216 | 1       | 0.77     | 17.07            | 3                 | 7332.9          | 1 | 2.56     | 1 |
| 20.1078  | 1       | 0.9      | 34.14            | 1                 | 167.8           | 2 | 0.89     | 2 |
| 18.29829 | 1       | 0.75     | 23.19            | 3                 | 5639.66         | 1 | 1.07     | 1 |
| 21.98476 | 1       | 1.07     | 27.42            | 1                 | 221.7           | 2 | 0.76     | 2 |
| 15.71744 | 3       | 0.75     | 24.77            | 3                 | 281.7           | 2 | 0.52     | 2 |
| 29       | 2       | 0.62     | 19.27            | 3                 | 197.43          | 3 | 1.5      | 1 |
| 19       | 1       | 1.2      | 29.71            | 1                 | 239.34          | 3 | 1.71     | 1 |
| 19       | 1       | 1.23     | 32.4             | 1                 | 3908.04         | 2 | 1.91     | 1 |
| 28.57143 | 1       | 0.536808 | 21.82289         | 1                 | 247.3667        | 2 | 0.613333 | 2 |
| 28.95033 | 1       | 0.476796 | 20.49828         | 1                 | 141.7333        | 2 | 0.603333 | 2 |
| 38.27139 | 1       | 1.06     | 32.39            | 1                 | 1207.667        | 1 | 0.9067   | 2 |
| 26.19036 | 1       | 0.73     | 26.54            | 1                 | 422.7667        | 2 | 0.7767   | 2 |
| 60.15031 | 1       | 0.77     | 26.6             | 1                 | 266.4667        | 2 | 0.8267   | 2 |
| 17.16697 | 1       | 1.06     | 30.65            | 1                 | 226.46          | 2 | 0.95     | 2 |
| 19.12528 | 1       | 1.06     | 27.91            | 1                 | 4559.63         | 1 | 1.09     | 1 |
| 14.32979 | 3       | 0.33     | 12.88            | 3                 | 13709.23        | 1 | 1.46     | 1 |
| 4.519234 | 3       | 0.03     | 9.88             | 3                 | 3571.033        | 1 | 1.473333 | 1 |
| 24.3045  | 1       | 0.327053 | 11.6234          | 3                 | 150.3667        | 2 | 1.09     | 1 |
| 17.50934 | 3       | 0.461848 | 32.13344         | 1                 | 681.15          | 1 | 1.15     | 1 |
| 15.17913 | 1       | 0.947954 | 24.06648         | 1                 | 402.2           | 2 | 1.09     | 1 |
| 15.02398 | 3       | 0.574381 | 18.47513         | 1                 | 80.2            | 2 | 1.43     | 1 |
| 15.88026 | 1       | 1.05     | 27.47            | 1                 | 881.4           | 1 | 1.646667 | 1 |
| 14.42119 | 1       | 1.35     | 33.09            | 1                 | 3809.69         | 1 | 1.08     | 1 |
| 24.0474  | 1       | 0.8      | 22.96            | 3                 | 267.63          | 2 | 1.21     | 1 |

|          |   |          |          |   |          |   |          |   |
|----------|---|----------|----------|---|----------|---|----------|---|
| 19.82913 | 3 | 0.546074 | 25.76621 | 1 | 340.85   | 2 | 0.405    | 2 |
| 19.98029 | 1 | 1.17     | 35.07    | 2 | 628.27   | 2 | 1.77     | 1 |
| 15       | 1 | 1.01     | 29.28    | 1 | 225.27   | 3 | 1.13     | 1 |
| 25       | 2 | 1.24     | 33       | 1 | 595.32   | 3 | 1.82     | 1 |
| 20       | 1 | 0.85     | 27.08    | 1 | 251.51   | 3 | 0.99     | 1 |
| 19.07319 | 1 | 0.859447 | 27.43171 | 2 | 441.6    | 2 | 0.945    | 2 |
| 16.31399 | 3 | 0.65     | 25.4     | 1 | 119.4    | 2 | 0.97     | 2 |
| 8.969484 | 3 | 0.43     | 16.11    | 3 | 128.9    | 2 | 1.14     | 1 |
| 16.54813 | 3 | 0.41     | 24.53    | 3 | 160.6    | 2 | 0.883333 | 2 |
| 11.65702 | 1 | 1.580253 | 30.86425 | 2 | 454.8    | 2 | 1.455    | 1 |
| 52.05413 | 2 | 1.18     | 24.49    | 3 | 849.4    | 2 | 1.15     | 2 |
| 18       | 1 | 1.04     | 24.14    | 3 | 181.57   | 3 | 1.06     | 1 |
| 18       | 3 | 0.75     | 27.77    | 1 | 332.44   | 3 | 1.03     | 1 |
| 16       | 1 | 1.41     | 36.56    | 2 | 1015.64  | 1 | 2.33     | 1 |
| 27.94366 | 1 | 0.53     | 18.1     | 3 | 373      | 2 | 0.7933   | 2 |
| 18       | 3 | 0.51     | 20.46    | 3 | 186.86   | 3 | 1.12     | 1 |
| 20.14665 | 3 | 0.251549 | 14.13092 | 3 | 79.2     | 2 | 0.475    | 2 |
| 25.67236 | 3 | 0.21831  | 15.73378 | 3 | 66.2     | 2 | 0.46     | 2 |
| 25.57294 | 1 | 1.01     | 32.18    | 1 | 45.13333 | 2 | 0.926667 | 2 |
| 12       | 3 | 0.67     | 19.64    | 3 | 232.7    | 3 | 1.33     | 1 |
| 18.42151 | 3 | 0.480471 | 20.92608 | 1 | 464.5    | 2 | 0.66     | 2 |
| 13.53069 | 3 | 0.53     | 19.01    | 3 | 3443.3   | 1 | 1.16     | 1 |
| 21       | 1 | 0.7      | 20.6     | 3 | 261.26   | 3 | 1.14     | 1 |
| 24       | 1 | 0.88     | 29.52    | 1 | 767.53   | 1 | 0.84     | 3 |
| 25       | 2 | 0.9      | 24.21    | 3 | 2772.33  | 1 | 1.68     | 1 |
| 24       | 3 | 0.43     | 27.47    | 1 | 683.36   | 1 | 0.44     | 3 |
| 30       | 1 | 0.81     | 27.56    | 1 | 530.62   | 3 | 2.11     | 1 |

| VITB2 | FIN      | MÉDIA | FIN      | EAR_VITB2 | MÉDIA    | FIN | EAR_VITB6 | MÉDIA | FIN | EAR_B12 | MÉDIA | FIN | EAR_VITC |
|-------|----------|-------|----------|-----------|----------|-----|-----------|-------|-----|---------|-------|-----|----------|
| 0.88  | 0.88     | 2     | 0.25     | 2         | 1.21     | 2   | 19.95     | 2     |     |         |       |     |          |
| 1.44  | 0.72     | 2     | 0.13     | 2         | 0        | 2   | 27.75     | 2     |     |         |       |     |          |
| 2.48  | 0.826667 | 2     | 0.5      | 2         | 2.496667 | 1   | 13.56667  | 2     |     |         |       |     |          |
| 2.3   | 2.3      | 1     | 0.97     | 2         | 3.63     | 1   | 0         | 2     |     |         |       |     |          |
| 1.92  | 0.96     | 2     | 0.215    | 2         | 0.75     | 2   | 8.1       | 2     |     |         |       |     |          |
| 1.26  | 0.42     | 2     | 0.35     | 2         | 0.4033   | 2   | 5.8333    | 2     |     |         |       |     |          |
| 2.67  | 0.89     | 2     | 0.66     | 2         | 0        | 2   | 10.9667   | 2     |     |         |       |     |          |
| 1.05  | 0.525    | 2     | 0.315    | 2         | 2.735    | 1   | 0         | 2     |     |         |       |     |          |
| 3.27  | 1.635    | 1     | 0.35     | 2         | 3.645    | 1   | 26.65     | 2     |     |         |       |     |          |
| 2.4   | 1.2      | 1     | 0.54     | 2         | 1.825    | 2   | 4.2       | 2     |     |         |       |     |          |
| 1.8   | 0.9      | 2     | 0.49     | 2         | 4.295    | 1   | 5.2       | 2     |     |         |       |     |          |
| 10    | 3.32     | 1     | 2.86     | 1         | 4.92     | 1   | 97.82     | 1     |     |         |       |     |          |
| 1.88  | 0.626667 | 2     | 0.406667 | 2         | 3.29     | 1   | 44.5      | 2     |     |         |       |     |          |
| 6.75  | 2.25     | 2     | 1.1267   | 1         | 2.0233   | 1   | 77.9667   | 1     |     |         |       |     |          |
| 11    | 3.51     | 1     | 2.57     | 1         | 5.08     | 1   | 1378.86   | 1     |     |         |       |     |          |
| 14.95 | 4.98     | 1     | 2.46     | 1         | 122.82   | 1   | 79.6      | 1     |     |         |       |     |          |
| 2.58  | 0.86     | 2     | 1.303333 | 1         | 1.423333 | 2   | 36.46667  | 2     |     |         |       |     |          |
| 4     | 1.42     | 1     | 1.46     | 1         | 3.15     | 1   | 27.6      | 3     |     |         |       |     |          |
| 0.77  | 0.385    | 2     | 0.16     | 2         | 1.015    | 2   | 17.75     | 2     |     |         |       |     |          |
| 1.71  | 0.855    | 2     | 0.505    | 2         | 0.305    | 2   | 20.55     | 2     |     |         |       |     |          |
| 19.38 | 6.46     | 1     | 2.82     | 1         | 143.59   | 1   | 49.53     | 2     |     |         |       |     |          |
| 10.87 | 3.623333 | 1     | 2.053333 | 1         | 71.95667 | 1   | 69.53333  | 1     |     |         |       |     |          |
| 11.06 | 3.68     | 1     | 1.82     | 1         | 71.63    | 1   | 69.99     | 1     |     |         |       |     |          |
| 3.32  | 1.1      | 1     | 1.08     | 1         | 3.28     | 1   | 28.93     | 2     |     |         |       |     |          |
| 8.05  | 2.68     | 1     | 1.65     | 1         | 58.22    | 1   | 33.86     | 2     |     |         |       |     |          |
| 2.32  | 0.77     | 2     | 1.23     | 1         | 0.98     | 2   | 6.66      | 2     |     |         |       |     |          |
| 1.18  | 0.39     | 2     | 0.73     | 2         | 0.84     | 2   | 26.33     | 2     |     |         |       |     |          |
| 8     | 2.69     | 1     | 2.52     | 1         | 10.49    | 1   | 26.56     | 3     |     |         |       |     |          |
| 6     | 1.97     | 1     | 1.36     | 1         | 4.51     | 1   | 89.75     | 1     |     |         |       |     |          |
| 9     | 3        | 1     | 1.79     | 1         | 26.15    | 1   | 51.05     | 3     |     |         |       |     |          |
| 3.62  | 1.206667 | 1     | 0.523333 | 2         | 0.523333 | 2   | 0         | 2     |     |         |       |     |          |
| 2.88  | 0.96     | 2     | 0.326667 | 2         | 3.103333 | 1   | 0.6       | 2     |     |         |       |     |          |
| 2.25  | 0.75     | 2     | 0.2733   | 2         | 0.6      | 2   | 16.2      | 2     |     |         |       |     |          |
| 3.23  | 1.0767   | 2     | 0.2433   | 2         | 1.21     | 2   | 10.8      | 2     |     |         |       |     |          |
| 3.38  | 1.1267   | 2     | 0.2033   | 2         | 1.21     | 2   | 5.4       | 2     |     |         |       |     |          |
| 1.71  | 0.57     | 2     | 0.69     | 2         | 0.99     | 2   | 36.46     | 2     |     |         |       |     |          |
| 7.71  | 2.57     | 1     | 1.1      | 1         | 47.69    | 1   | 33.63     | 2     |     |         |       |     |          |
| 18.48 | 6.16     | 1     | 3.12     | 1         | 144.71   | 1   | 52.96     | 2     |     |         |       |     |          |
| 6.34  | 2.113333 | 1     | 2.646667 | 1         | 36.99667 | 1   | 62.96667  | 2     |     |         |       |     |          |
| 2.16  | 0.72     | 2     | 0.17     | 2         | 1.62     | 2   | 1         | 2     |     |         |       |     |          |
| 1.71  | 0.855    | 2     | 0.77     | 2         | 0.605    | 2   | 61.45     | 2     |     |         |       |     |          |
| 3.17  | 1.585    | 1     | 0.565    | 2         | 1.515    | 2   | 65.45     | 1     |     |         |       |     |          |
| 2.5   | 1.25     | 1     | 0.6      | 2         | 0        | 2   | 4.2       | 2     |     |         |       |     |          |
| 2.96  | 0.986667 | 2     | 0.86     | 2         | 1.1      | 2   | 33.85     | 2     |     |         |       |     |          |
| 5.64  | 1.88     | 1     | 1.45     | 1         | 36.73    | 1   | 31.99     | 2     |     |         |       |     |          |
| 4.21  | 1.4      | 1     | 1.82     | 1         | 2.51     | 1   | 19.83     | 2     |     |         |       |     |          |

|      |          |   |          |   |          |   |          |   |
|------|----------|---|----------|---|----------|---|----------|---|
| 2.64 | 1.32     | 1 | 0.345    | 2 | 3.03     | 1 | 1.5      | 2 |
| 6.2  | 2.06     | 1 | 1.99     | 1 | 7.18     | 1 | 48.86    | 2 |
| 5    | 1.54     | 1 | 1.42     | 1 | 0.59     | 3 | 24.06    | 3 |
| 6    | 2.02     | 1 | 2.25     | 1 | 6.24     | 1 | 104.41   | 1 |
| 3    | 1.07     | 1 | 1.45     | 1 | 3.51     | 1 | 128.94   | 1 |
| 2.1  | 1.05     | 2 | 0.455    | 2 | 2.425    | 1 | 96.95    | 1 |
| 1.72 | 0.57     | 2 | 0.55     | 2 | 1.05     | 2 | 27.73    | 2 |
| 2.4  | 0.8      | 2 | 0.89     | 2 | 1.45     | 2 | 24.63    | 2 |
| 1.57 | 0.523333 | 2 | 0.82     | 2 | 0.333333 | 2 | 29.76667 | 2 |
| 1.62 | 0.81     | 2 | 0.285    | 2 | 0.605    | 2 | 95.1     | 1 |
| 3.48 | 1.16     | 2 | 0.5733   | 2 | 0.61     | 2 | 49.7     | 2 |
| 3    | 1.14     | 1 | 1.61     | 1 | 3.51     | 1 | 206.96   | 1 |
| 5    | 1.6      | 1 | 1.6      | 1 | 4.25     | 1 | 203.57   | 1 |
| 6    | 2.16     | 1 | 1.62     | 1 | 1.8      | 3 | 77.98    | 1 |
| 1.52 | 0.5067   | 2 | 0.1967   | 2 | 0 #NULL! |   | 30.4     | 2 |
| 5    | 1.71     | 1 | 1.73     | 1 | 2.8      | 1 | 3945.92  | 2 |
| 0.95 | 0.475    | 2 | 0.125    | 2 | 1.215    | 2 | 60.45    | 2 |
| 1.23 | 0.615    | 2 | 0.295    | 2 | 2.735    | 1 | 0        | 2 |
| 4.07 | 1.356667 | 1 | 1.616667 | 1 | 7.066667 | 1 | 10.3     | 2 |
| 7    | 2.24     | 1 | 1.69     | 1 | 1.49     | 3 | 80.08    | 1 |
| 1.71 | 0.855    | 2 | 0.35     | 2 | 0.605    | 2 | 5.1      | 2 |
| 5.04 | 1.68     | 1 | 0.88     | 2 | 36.87    | 1 | 45.69    | 2 |
| 4    | 1.34     | 1 | 1.63     | 1 | 6.14     | 1 | 92.49    | 1 |
| 3    | 1.09     | 1 | 1.13     | 1 | 6.58     | 1 | 99.33    | 1 |
| 7    | 2.24     | 1 | 2.58     | 1 | 9.82     | 1 | 207.38   | 1 |
| 2    | 0.65     | 3 | 1.32     | 1 | 2.16     | 1 | 67.31    | 1 |
| 5    | 1.82     | 1 | 1.83     | 1 | 5.27     | 1 | 116.73   | 1 |



| MÉDIA_FINEAR_VITE |   | MÉDIA_FINEAR_FOL |   | MÉDIA_FINEAR_CA |   | MÉDIA_FINEAR_P |   | EAR_MG |
|-------------------|---|------------------|---|-----------------|---|----------------|---|--------|
| 4.9               | 2 | 50.5             | 2 | 204.4           | 2 | 592.9          | 2 | 2      |
| 0                 | 2 | 3.3              | 2 | 244             | 2 | 707.6          | 2 | 2      |
| 1.4               | 2 | 45.73333         | 2 | 176.5667        | 2 | 615.4          | 2 | 2      |
| 4.9               | 2 | 143.5            | 2 | 401.5           | 2 | 901            | 2 | 2      |
| 0.65              | 2 | 33.5             | 2 | 394.15          | 2 | 1700.05        | 1 | 2      |
| 0.3667            | 2 | 15.9333          | 2 | 85              | 2 | 635.4667       | 2 | 2      |
| 0.0333            | 2 | 3.3333           | 2 | 187.2667        | 2 | 943.8          | 2 | 2      |
| 0.5               | 2 | 20.05            | 2 | 122.45          | 2 | 496.6          | 2 | 2      |
| 1.15              | 2 | 43.35            | 2 | 479.1           | 2 | 1231.05        | 1 | 2      |
| 0.85              | 2 | 28.65            | 2 | 291.75          | 2 | 962.95         | 2 | 2      |
| 0.15              | 2 | 21.25            | 2 | 172.2           | 2 | 1045.6         | 1 | 2      |
| 5.22              | 3 | 263.5            | 2 | 616.21          | 2 | 1433.14        | 1 | 2      |
| 3.7               | 2 | 18.16667         | 2 | 284.1667        | 2 | 979.6          | 2 | 2      |
| 1.5667            | 2 | 129.52           | 2 | 944.1           | 2 | 1921.967       | 1 | 2      |
| 5.19              | 3 | 385.1            | 1 | 779.74          | 2 | 1590.12        | 1 | 2      |
| 4.6               | 2 | 286.03           | 2 | 285.73          | 2 | 1140.7         | 1 | 2      |
| 9.866667          | 2 | 55.5             | 2 | 307.3333        | 2 | 1086.233       | 2 | 2      |
| 2.34              | 3 | 161.39           | 2 | 172.66          | 2 | 820.26         | 2 | 2      |
| 0.05              | 2 | 3.4              | 2 | 139.6           | 2 | 1122.3         | 1 | 2      |
| 0.4               | 2 | 13.6             | 2 | 162.65          | 2 | 891.5          | 2 | 2      |
| 6.5               | 2 | 310.23           | 2 | 418.2           | 2 | 1985           | 1 | 2      |
| 17.43333          | 1 | 210.9667         | 2 | 266.8667        | 2 | 1280           | 1 | 2      |
| 17.41             | 1 | 218.25           | 2 | 428.41          | 2 | 1408.12        | 1 | 2      |
| 13.76             | 1 | 53.73            | 2 | 288.4           | 2 | 959.66         | 2 | 2      |
| 8.56              | 2 | 148.46           | 2 | 222.23          | 2 | 1008.96        | 2 | 2      |
| 25.13             | 1 | 47.83            | 2 | 158.8           | 2 | 1129.3         | 1 | 2      |
| 4.6               | 2 | 30.3             | 2 | 208.86          | 2 | 476.96         | 2 | 2      |
| 4.67              | 3 | 163.17           | 2 | 393.05          | 2 | 1663.44        | 1 | 2      |
| 2.25              | 2 | 198.89           | 2 | 366.13          | 2 | 1167.06        | 1 | 2      |
| 3.52              | 3 | 364.77           | 1 | 543.95          | 2 | 1660.47        | 1 | 2      |
| 1.3               | 2 | 56.4             | 2 | 131.9667        | 2 | 925.3333       | 2 | 2      |
| 1.233333          | 2 | 42.83333         | 2 | 155.4333        | 2 | 861.6          | 2 | 2      |
| 0.4667            | 2 | 24.0667          | 2 | 459.1667        | 2 | 1618.933       | 1 | 2      |
| 1.1333            | 2 | 55.1333          | 2 | 267.9           | 2 | 1419.7         | 1 | 2      |
| 1.1333            | 2 | 54.8             | 2 | 302.1           | 2 | 1547.767       | 1 | 2      |
| 5.96              | 2 | 36.86            | 2 | 151.5           | 2 | 822.53         | 2 | 2      |
| 7.6               | 2 | 133              | 2 | 537             | 2 | 1239.06        | 1 | 2      |
| 14.8              | 1 | 324.36           | 2 | 266.9           | 2 | 1604.3         | 1 | 2      |
| 7.533333          | 2 | 129.3333         | 2 | 176.8667        | 2 | 1236.633       | 1 | 2      |
| 0.1               | 2 | 8.066667         | 2 | 169.8           | 2 | 1032.5         | 1 | 2      |
| 0.8               | 2 | 23.9             | 2 | 530.85          | 2 | 889.8          | 2 | 2      |
| 2.25              | 2 | 68.15            | 2 | 376.2           | 2 | 1136.45        | 1 | 2      |
| 0                 | 2 | 4                | 2 | 211.05          | 2 | 984.6          | 2 | 2      |
| 10.26667          | 2 | 82.63333         | 2 | 319.5           | 2 | 982.0667       | 2 | 2      |
| 4.54              | 2 | 94.28            | 2 | 234.86          | 2 | 942.06         | 1 | 2      |
| 11.03             | 2 | 71.43            | 2 | 507.03          | 2 | 1400.16        | 1 | 2      |

|          |   |          |   |          |   |          |   |   |
|----------|---|----------|---|----------|---|----------|---|---|
| 2.5      | 2 | 78.15    | 2 | 254.15   | 2 | 808.2    | 2 | 2 |
| 23.77    | 1 | 144.36   | 2 | 439.77   | 2 | 1359.68  | 1 | 2 |
| 2.34     | 3 | 131.19   | 2 | 251.67   | 2 | 744.24   | 2 | 2 |
| 1.86     | 3 | 65.67    | 2 | 839.99   | 2 | 1511.13  | 1 | 2 |
| 2.97     | 3 | 292.11   | 2 | 185.97   | 2 | 815.77   | 2 | 2 |
| 1.65     | 2 | 53.25    | 2 | 226.15   | 2 | 1210.35  | 1 | 2 |
| 4.3      | 2 | 36.3     | 2 | 298.8    | 2 | 405.9    | 2 | 2 |
| 10.7     | 2 | 52.33    | 2 | 450.3    | 2 | 910.2    | 2 | 2 |
| 6.233333 | 2 | 68.8     | 2 | 161.5    | 2 | 493.3667 | 2 | 2 |
| 0.8      | 2 | 23.9     | 2 | 255      | 2 | 1145.35  | 1 | 2 |
| 0.7      | 2 | 33.9     | 2 | 1000.967 | 2 | 2380.267 | 1 | 2 |
| 3.53     | 3 | 150.98   | 2 | 215.92   | 2 | 980.06   | 2 | 2 |
| 4.24     | 3 | 241.15   | 2 | 232.96   | 2 | 804.02   | 2 | 2 |
| 2.64     | 3 | 192.17   | 2 | 504.19   | 2 | 1289.1   | 1 | 2 |
| 0.0333   | 2 | 1.8      | 2 | 195.4333 | 2 | 924.1333 | 2 | 2 |
| 2.5      | 3 | 161.36   | 2 | 203.51   | 2 | 823.96   | 2 | 2 |
| 0.05     | 2 | 5.7      | 2 | 195.2    | 2 | 713.05   | 2 | 2 |
| 0.5      | 2 | 20.05    | 2 | 124.1    | 2 | 602.35   | 2 | 2 |
| 5.933333 | 2 | 71.03333 | 2 | 157.7    | 2 | 991.8333 | 2 | 2 |
| 2.49     | 3 | 147.71   | 2 | 227.11   | 2 | 827.58   | 2 | 2 |
| 0.8      | 2 | 26.25    | 2 | 255.4    | 2 | 881      | 2 | 2 |
| 3.8      | 2 | 101.16   | 2 | 174.86   | 2 | 744.4    | 2 | 2 |
| 3.53     | 3 | 171.53   | 2 | 325.45   | 2 | 1249.02  | 1 | 2 |
| 4.65     | 3 | 232.5    | 2 | 178.29   | 2 | 903.78   | 2 | 2 |
| 7.66     | 3 | 292.9    | 2 | 1025.23  | 2 | 1950.6   | 1 | 2 |
| 2.38     | 3 | 63.3     | 2 | 132.03   | 2 | 665.55   | 2 | 2 |
| 2.37     | 3 | 107.7    | 2 | 161.54   | 2 | 1417.29  | 1 | 2 |

| MÉDIA_FINEAR_FE |   | MÉDIA_FINEAR_ZN |   | MÉDIA_T  | EAR_SE | MÉDIA_PO | EAR_K | MÉDIA_FIN |
|-----------------|---|-----------------|---|----------|--------|----------|-------|-----------|
| 9.3             | 1 | 1.3             | 2 | 36.3     | 2      | 397.6    | 2     | 156.7     |
| 7.05            | 1 | 2.9             | 2 | 0 #NULL! |        | 797.25   | 2     | 197.2     |
| 6.366667        | 2 | 5.133333        | 2 | 48.4     | 1      | 504.0333 | 2     | 449.5333  |
| 7.9             | 1 | 4.8             | 2 | 108.8    | 1      | 397.6    | 2     | 670.7     |
| 19.15           | 1 | 23.65           | 1 | 25.45    | 2      | 1584.1   | 2     | 600.4     |
| 5.7667          | 2 | 9.0667          | 1 | 12.1     | 2      | 1090.333 | 2     | 655.9     |
| 9.9333          | 1 | 8.4333          | 2 | 2.4667   | 2      | 1095.167 | 2     | 1993.067  |
| 9.55            | 1 | 4.5             | 2 | 38.75    | 2      | 306.65   | 2     | 210.6     |
| 14.45           | 1 | 7.8             | 2 | 55.25    | 1      | 1304.45  | 2     | 986.85    |
| 12.8            | 1 | 4.3             | 2 | 33       | 2      | 599.3    | 2     | 985.75    |
| 11.15           | 1 | 7.8             | 2 | 66.85    | 1      | 1041.3   | 2     | 794.05    |
| 15.67           | 1 | 14.2            | 1 | 115.19   | 1      | 3074.27  | 2     | 2150      |
| 9.633333        | 1 | 5.566667        | 2 | 63.4     | 1      | 1146.067 | 2     | 900.9333  |
| 14.8667         | 1 | 17.2333         | 1 | 74.8     | 1      | 2174.7   | 2     | 1765.767  |
| 19              | 1 | 15.94           | 1 | 126.75   | 1      | 3348.66  | 2     | 4939      |
| 17.03           | 1 | 10.63           | 1 | 121.1    | 1      | 1581.7   | 2     | 2219.8    |
| 16.66667        | 1 | 9.366667        | 2 | 67.26667 | 1      | 2607.6   | 2     | 3199.967  |
| 10.26           | 1 | 9.73            | 1 | 79.78    | 1      | 1730.18  | 2     | 2087      |
| 6.3             | 2 | 4.3             | 2 | 12.25    | 2      | 1083.4   | 2     | 190.2     |
| 9.75            | 1 | 3.7             | 2 | 9.05     | 2      | 777.2    | 2     | 1469.45   |
| 26.26           | 1 | 12.6            | 2 | 129.8    | 1      | 1711     | 1     | 3508.43   |
| 18.3            | 1 | 9.833333        | 1 | 108      | 1      | 1852.767 | 2     | 2481.833  |
| 28.57           | 1 | 8.57            | 2 | 108.44   | 1      | 1934.72  | 1     | 3539.27   |
| 11.3            | 1 | 9.63            | 2 | 74.16    | 1      | 1329     | 1     | 1659.73   |
| 13.93           | 1 | 8.23            | 2 | 101      | 1      | 1387.4   | 2     | 2255.66   |
| 13.83           | 1 | 10.6            | 1 | 72.56    | 1      | 1632.23  | 2     | 3440.4    |
| 6.4             | 2 | 4.8             | 2 | 27.46    | 2      | 729.83   | 2     | 1514.7    |
| 8.77            | 1 | 8.97            | 1 | 237.34   | 1      | 2488.28  | 2     | 2188      |
| 11.11           | 1 | 13.08           | 1 | 94.26    | 1      | 2258.92  | 2     | 3170      |
| 14.69           | 1 | 12.96           | 1 | 76.41    | 1      | 2415.24  | 2     | 3245      |
| 11.2            | 1 | 8.133333        | 2 | 74.8     | 1      | 650.6333 | 2     | 408.1667  |
| 11.03333        | 1 | 6.6             | 2 | 52.23333 | 1      | 586.4333 | 2     | 198.7667  |
| 12.8667         | 1 | 14              | 1 | 17.1667  | 2      | 1057.733 | 2     | 713.1333  |
| 16.7667         | 1 | 19.5            | 1 | 39.3     | 2      | 1260     | 2     | 340.6667  |
| 16.1            | 1 | 17.9333         | 1 | 40.2667  | 2      | 1466.1   | 2     | 401.0667  |
| 11.46           | 1 | 8.26            | 2 | 56.53    | 1      | 1276.73  | 2     | 1543.26   |
| 12.66           | 1 | 8.13            | 2 | 61.76    | 1      | 1834.66  | 1     | 2093.8    |
| 21.46           | 1 | 13.83           | 1 | 147.8    | 1      | 1513.133 | 2     | 2770.567  |
| 15.66667        | 1 | 7.133333        | 2 | 135.5667 | 1      | 1434.033 | 2     | 2870.967  |
| 14.36667        | 1 | 4.666667        | 2 | 19.83333 | 2      | 488.0333 | 2     | 97.6      |
| 14.55           | 1 | 6.45            | 2 | 18.15    | 2      | 615.35   | 2     | 571.2     |
| 15.15           | 1 | 5.5             | 2 | 45.35    | 1      | 1016.6   | 2     | 848.3     |
| 9.45            | 1 | 3.35            | 2 | 0.05     | 2      | 1017.2   | 2     | 578.85    |
| 15.73333        | 1 | 5.833333        | 2 | 59.6     | 1      | 1888.033 | 2     | 1876.233  |
| 12.74           | 1 | 4.86            | 2 | 67.9     | 1      | 1051.03  | 1     | 2298.24   |
| 12.03           | 1 | 6.86            | 2 | 149.93   | 1      | 1685.43  | 1     | 1738.86   |

|          |   |          |   |          |   |          |   |          |
|----------|---|----------|---|----------|---|----------|---|----------|
| 7.95     | 1 | 4.45     | 2 | 69.3     | 1 | 428.95   | 2 | 361.75   |
| 20.66    | 1 | 18.43    | 2 | 105.9    | 1 | 2369.89  | 1 | 2476.35  |
| 9.66     | 1 | 7.25     | 2 | 45.8     | 1 | 1956     | 2 | 2500     |
| 13.85    | 1 | 19.75    | 1 | 140.07   | 1 | 1949.29  | 2 | 1948     |
| 11.58    | 1 | 11.66    | 1 | 114.9    | 1 | 1886.07  | 2 | 713      |
| 11.6     | 1 | 7.25     | 2 | 51.15    | 1 | 1282.75  | 2 | 648.9    |
| 6.63     | 2 | 5.46     | 2 | 24       | 2 | 1086.73  | 2 | 912.26   |
| 11.63    | 1 | 5.7      | 2 | 58.8     | 1 | 1559.8   | 1 | 1807.66  |
| 10.8     | 1 | 4.5      | 2 | 30.03333 | 2 | 501      | 2 | 909.7    |
| 12.25    | 1 | 4.6      | 2 | 18.15    | 2 | 823      | 2 | 1587.15  |
| 15.9667  | 1 | 15.7333  | 1 | 25.5     | 2 | 3071.133 | 2 | 1108.967 |
| 10.86    | 1 | 11.02    | 1 | 113.67   | 1 | 1531.87  | 2 | 1799     |
| 10.86    | 1 | 10.55    | 1 | 76.19    | 1 | 2275.33  | 2 | 1166     |
| 10.39    | 1 | 9.8      | 1 | 60.93    | 1 | 2283.11  | 2 | 3843     |
| 12.7333  | 1 | 10.8667  | 1 | 0.2333   | 2 | 1383.033 | 2 | 387.3667 |
| 10.54    | 1 | 9.94     | 1 | 64.5     | 1 | 1927.37  | 2 | 1764     |
| 8        | 1 | 3.1      | 2 | 14.85    | 2 | 447.7    | 2 | 235.25   |
| 7.65     | 1 | 5.4      | 2 | 38.75    | 2 | 38.75    | 2 | 172.45   |
| 14.26667 | 1 | 15.73333 | 1 | 76.13333 | 1 | 1465.733 | 2 | 1760.367 |
| 6.95     | 2 | 5.35     | 2 | 51.78    | 1 | 1100.06  | 2 | 3025     |
| 7.9      | 1 | 3.6      | 2 | 18.15    | 2 | 659.3    | 2 | 240.8    |
| 12.73    | 1 | 6.53     | 2 | 63.83    | 1 | 1027.6   | 2 | 2222.03  |
| 9.87     | 1 | 9.18     | 1 | 150.41   | 1 | 2339.76  | 2 | 1993     |
| 12       | 1 | 14.78    | 1 | 102.49   | 1 | 2300.88  | 2 | 845      |
| 17.44    | 1 | 13.9     | 1 | 227.68   | 1 | 3993.04  | 2 | 2974     |
| 5.16     | 2 | 4.71     | 2 | 70.49    | 1 | 1549     | 2 | 340      |
| 12.76    | 1 | 21.67    | 1 | 139.67   | 1 | 2767.77  | 2 | 1023     |

| EAR_NA | Sat_percen @_GSAT | Poli_percei @_GPOLI | Mono_Per @_GMON | MÉDIA_Fib  | Reco_Fibra |
|--------|-------------------|---------------------|-----------------|------------|------------|
| 1      | 0                 | 1 0.470711          | 3 0             | 3 6.6      | 22         |
| 1      | 2.875118          | 1 1.078169          | 3 2.417712      | 3 4.05     | 22         |
| 1      | 3.241258          | 1 2.13923           | 3 2.722656      | 3 4.7      | 21         |
| 1      | 1.397635          | 1 0.27051           | 3 0.766445      | 3 6.5      | 20         |
| 2      | 7.799702          | 1 2.366962          | 3 7.033258      | 3 6.5      | 20         |
| 2      | 9.767263          | 1 2.89967           | 3 9.404768      | 3 6.566667 | 21         |
| 1      | 6.219472          | 1 2.487796          | 3 6.642383      | 3 9.2      | 23         |
| 1      | 0.030855          | 1 0.046282          | 3 0.030855      | 3 8.3      | 22         |
| 1      | 5.04638           | 1 2.418454          | 3 4.170405      | 3 11.25    | 23         |
| 1      | 1.132034          | 1 0.674867          | 3 1.153804      | 3 10.4     | 22         |
| 1      | 2.768033          | 1 1.891033          | 3 2.576189      | 3 6.5      | 20         |
| 1      | 10                | 1 6                 | 1 10            | 3 23.69    | 19         |
| 1      | 4.413152          | 1 2.8506            | 3 3.969725      | 3 4.5      | 24         |
| 1      | 24.7873           | 2 4.987872          | 3 19.4703       | 1 4.233333 | 19         |
| 2      | 11                | 2 5                 | 3 11            | 1 27.4     | 21         |
| 1      | 16.03453          | 2 2.597142          | 3 5.744765      | 3 14.03333 | 24         |
| 2      | 6.289366          | 1 3.611715          | 3 5.905362      | 3 21.56667 | 21         |
| 1      | 9                 | 1 5                 | 3 9             | 3 23.29    | 22         |
| 1      | 1.978885          | 1 1.338658          | 3 2.153493      | 3 2.95     | 24         |
| 1      | 6.325191          | 1 6.082632          | 1 7.220793      | 3 9.2      | 23         |
| 1      | 4.864134          | 1 2.825503          | 3 3.968661      | 3 15.93    | 25         |
| 2      | 5.675846          | 1 6.072133          | 1 7.107591      | 3 12.2     | 22         |
| 1      | 8.943191          | 1 4.194798          | 3 5.947848      | 3 16.57    | 22         |
| 1      | 10.30001          | 2 6.711991          | 1 12.45282      | 1 4.26     | 22         |
| 1      | 7.576301          | 1 4.445598          | 3 7.899004      | 3 13.06    | 23         |
| 2      | 8.085144          | 1 7.506453          | 1 9.077186      | 3 17.96    | 23         |
| 1      | 8.397093          | 1 2.229768          | 3 5.276551      | 3 6.8      | 21         |
| 1      | 6                 | 1 5                 | 3 6             | 3 14.48    | 23         |
| 2      | 11                | 2 4                 | 3 11            | 1 27.06    | 22         |
| 2      | 11                | 2 6                 | 1 12            | 1 26.21    | 23         |
| 1      | 1.147644          | 1 1.235924          | 3 1.368345      | 3 4.633333 | 20         |
| 1      | 1.822969          | 1 1.392546          | 3 2.253393      | 3 4.233333 | 19         |
| 2      | 17.32497          | 2 2.696697          | 3 14.99687      | 1 2.95     | 24         |
| 2      | 7.308245          | 1 3.18748           | 3 7.566689      | 3 14.05    | 21         |
| 2      | 15.74919          | 2 9.658696          | 1 17.31796      | 1 1.6      | 21         |
| 1      | 11.55369          | 2 4.330096          | 3 11.11713      | 1 8.26     | 21         |
| 1      | 8.854674          | 1 3.391249          | 3 5.915287      | 3 16.66    | 21         |
| 2      | 8.079405          | 1 5.543763          | 3 8.520386      | 3 5.933333 | 22         |
| 2      | 6.693007          | 1 3.141327          | 3 6.353404      | 3 8.4      | 24         |
| 1      | 1.449825          | 1 1.163676          | 3 1.774128      | 3 6.566667 | 21         |
| 1      | 8.573313          | 1 2.555507          | 3 6.059024      | 3 2.8      | 23         |
| 1      | 4.487535          | 1 3.157895          | 3 4.342105      | 3 12.15    | 22         |
| 1      | 5.126778          | 1 1.849386          | 3 5.173598      | 3 10.4     | 23         |
| 1      | 10.752            | 2 4.116882          | 3 8.941133      | 3 14.1     | 23         |
| 1      | 11.61647          | 2 1.777597          | 3 7.165938      | 3 5.18     | 24         |
| 1      | 8.326036          | 1 4.456483          | 3 6.565243      | 3 11.76    | 23         |

|   |          |   |          |   |          |   |          |    |
|---|----------|---|----------|---|----------|---|----------|----|
| 1 | 1.43301  | 1 | 0.209709 | 3 | 0.524272 | 3 | 5.1      | 21 |
| 1 | 11.07521 | 2 | 6.896484 | 1 | 12.677   | 1 | 12.84    | 21 |
| 2 | 11       | 2 | 5        | 3 | 11       | 1 | 18.17    | 21 |
| 1 | 14       | 2 | 3        | 3 | 12       | 1 | 25.02    | 23 |
| 1 | 8        | 1 | 6        | 1 | 10       | 3 | 11.68    | 22 |
| 1 | 3.919739 | 1 | 4.824294 | 3 | 4.867368 | 3 | 14.05    | 21 |
| 2 | 10.02621 | 2 | 3.346962 | 3 | 7.530664 | 3 | 7.36     | 21 |
| 1 | 5.880583 | 1 | 4.656816 | 3 | 5.284944 | 3 | 17.36    | 21 |
| 2 | 10.17126 | 2 | 2.611204 | 3 | 7.33624  | 3 | 5.733333 | 24 |
| 1 | 2.005574 | 1 | 1.203345 | 3 | 2.098139 | 3 | 8.3      | 22 |
| 2 | 11.09039 | 2 | 4.110941 | 3 | 10.34132 | 1 | 6.5      | 20 |
| 1 | 7        | 1 | 5        | 3 | 8        | 3 | 16.76    | 21 |
| 1 | 11       | 2 | 3        | 3 | 10       | 3 | 17.48    | 23 |
| 2 | 13       | 2 | 6        | 1 | 12       | 1 | 20.41    | 22 |
| 2 | 4.855394 | 1 | 1.809724 | 3 | 6.267923 | 3 | 4.633333 | 20 |
| 1 | 6        | 1 | 5        | 3 | 7        | 3 | 21.16    | 20 |
| 1 | 3.852757 | 1 | 0.579985 | 3 | 2.31994  | 3 | 2.85     | 23 |
| 1 | 2.076306 | 1 | 0.876662 | 3 | 1.845605 | 3 | 1.6      | 21 |
| 1 | 11.0043  | 2 | 2.407191 | 3 | 12.21695 | 1 | 10.83333 | 22 |
| 2 | 7        | 1 | 4        | 3 | 7        | 3 | 18.08    | 22 |
| 1 | 3.508088 | 1 | 3.938325 | 3 | 3.640469 | 3 | 8.05     | 22 |
| 1 | 6.911798 | 1 | 2.5504   | 3 | 6.622467 | 3 | 14       | 24 |
| 1 | 7        | 1 | 5        | 3 | 7        | 3 | 23.75    | 23 |
| 1 | 10       | 1 | 4        | 3 | 12       | 1 | 16.26    | 19 |
| 2 | 10       | 1 | 5        | 3 | 8        | 3 | 26.62    | 23 |
| 1 | 8        | 1 | 7        | 1 | 9        | 3 | 18       | 22 |
| 1 | 10       | 1 | 3        | 3 | 11       | 1 | 17.32    | 20 |

| ADQ_FIB | MÉDIA_AC | EAR_B3 | MEDIA_KC | KCALKG   | Time | divisao | Carga_treir | NAF |     |
|---------|----------|--------|----------|----------|------|---------|-------------|-----|-----|
| 2       | 3.92     | 1      | 1147.2   | 17.56815 |      | 3       | 1           | 15  | 2   |
| 2       | 15.805   | 2      | 1377.335 | 16.79677 |      | 3       | 2           | 15  | 2   |
| 2       | 6.023333 | 1      | 925.5667 | 12.64435 |      | 3       | 3           | 15  | 2   |
| 2       | 2.53     | 1      | 1996.23  | 33.38177 |      | 3       | 1           | 15  | 2   |
| 2       | 2.53     | 1      | 1996.23  | 33.38177 |      | 2       | 2           | 10  | 2   |
| 2       | 15.21    | 2      | 1572.603 | 25.32373 |      | 2       | 3           | 10  | 2   |
| 2       | 14.845   | 2      | 2411.785 | 40.73961 |      | 2       | 3           | 15  | 2   |
| 2       | 17.81    | 2      | 2916.87  | 46.0801  |      | 3       | 2           | 15  | 2   |
| 2       | 9.63     | 1      | 2363.08  | 32.28251 |      | 3       | 2           | 15  | 2   |
| 2       | 16.58    | 2      | 2067.075 | 29.36186 |      | 3       | 2           | 15  | 2   |
| 2       | 6.135    | 1      | 1641.96  | 28.90775 |      | 3       | 2           | 15  | 2   |
| 1       | 24.24    | 1      | 2670     | 49       |      | 4       | 3           | 6   | 1.8 |
| 2       | 17.04667 | 2      | 1420.753 | 23.95874 |      | 3       | 3           | 15  | 2   |
| 2       | 11.48    | 1      | 1184.88  | 17.6     |      | 2       | 3           | 10  | 2   |
| 1       | 29.31    | 1      | 3557     | 51       |      | 4       | 3           | 6   | 1.8 |
| 2       | 33.50667 | 1      | 2125.413 | 31.81    |      | 1       | 3           | 15  | 2   |
| 2       | 18.87667 | 1      | 2890.593 | 45.66    |      | 1       | 3           | 15  | 2   |
| 1       | 17.81    | 1      | 1642     | 24       |      | 4       | 2           | 6   | 1.8 |
| 2       | 22.455   | 2      | 1546.325 | 22.64019 |      | 3       | 2           | 15  | 2   |
| 2       | 14.845   | 2      | 2411.785 | 40.73961 |      | 3       | 2           | 15  | 2   |
| 2       | 45.6     | 1      | 4723.76  | 67.48    |      | 1       | 3           | 15  | 2   |
| 2       | 30.04333 | 1      | 2346.787 | 38.78    |      | 1       | 3           | 15  | 2   |
| 2       | 29.53    | 1      | 2731.24  | 40.64    |      | 1       | 3           | 15  | 2   |
| 2       | 13.72    | 1      | 1881.26  | 29.21    |      | 1       | 3           | 15  | 2   |
| 2       | 28.86    | 1      | 1868.59  | 29.15    |      | 1       | 3           | 15  | 2   |
| 2       | 23.84    | 1      | 2177.327 | 35.23    |      | 1       | 3           | 15  | 2   |
| 2       | 12.222   | 1      | 1586.263 | 27.49    |      | 1       | 3           | 15  | 2   |
| 3       | 15.33    | 1      | 1866     | 29       |      | 4       | 3           | 6   | 1.8 |
| 1       | 21.26    | 1      | 2000     | 36       |      | 4       | 3           | 6   | 1.8 |
| 1       | 28.15    | 1      | 2112     | 34       |      | 4       | 3           | 6   | 1.8 |
| 2       | 6.763333 | 1      | 1359.307 | 22.13855 |      | 3       | 3           | 15  | 2   |
| 2       | 11.48    | 1      | 1184.88  | 20.93428 |      | 3       | 3           | 15  | 2   |
| 2       | 22.455   | 2      | 1546.325 | 22.64019 |      | 2       | 3           | 10  | 2   |
| 2       | 15.5     | 2      | 2089.425 | 28.19737 |      | 2       | 3           | 10  | 2   |
| 2       | 5.375    | 1      | 975.29   | 12.48771 |      | 2       | 3           | 10  | 2   |
| 2       | 14.59    | 1      | 1772.94  | 31.32    |      | 1       | 3           | 15  | 2   |
| 2       | 31.93    | 1      | 1971.84  | 34.3     |      | 1       | 3           | 15  | 2   |
| 2       | 43.97667 | 1      | 1904.843 | 23.2     |      | 1       | 3           | 15  | 2   |
| 2       | 51.78667 | 1      | 2120.123 | 28.15    |      | 1       | 3           | 15  | 2   |
| 2       | 15.21    | 2      | 1572.603 | 25.32373 |      | 3       | 3           | 15  | 2   |
| 2       | 14.635   | 2      | 1091.76  | 12.93555 |      | 3       | 2           | 15  | 2   |
| 2       | 18.68    | 2      | 2166     | 35.45008 |      | 1       | 2           | 15  | 2   |
| 2       | 12.15    | 2      | 1922.26  | 27.9805  |      | 3       | 2           | 15  | 2   |
| 2       | 20.47333 | 1      | 2120.537 | 34.79    |      | 1       | 3           | 15  | 2   |
| 2       | 28.53    | 1      | 2754.28  | 36.92    |      | 1       | 3           | 15  | 2   |
| 2       | 42.03    | 1      | 2146.76  | 31.38    |      | 1       | 3           | 15  | 2   |

|   |          |   |          |          |   |   |    |     |
|---|----------|---|----------|----------|---|---|----|-----|
| 2 | 3.385    | 1 | 1287.5   | 19.07407 | 3 | 2 | 15 | 2   |
| 2 | 32.05    | 1 | 2556.52  | 30.25    | 1 | 3 | 15 | 2   |
| 3 | 16.19    | 1 | 1788     | 31       | 4 | 3 | 6  | 1.8 |
| 1 | 28.4     | 1 | 2326     | 34       | 4 | 3 | 6  | 1.8 |
| 3 | 23.92    | 1 | 1696     | 28       | 4 | 3 | 6  | 1.8 |
| 2 | 15.5     | 2 | 2089.425 | 28.19737 | 3 | 2 | 15 | 2   |
| 2 | 6.66     | 2 | 1226.187 | 23.22    | 1 | 3 | 15 | 2   |
| 2 | 16.43    | 1 | 1662.08  | 24.22    | 1 | 3 | 15 | 2   |
| 2 | 11.55333 | 2 | 1206.34  | 15.09    | 1 | 3 | 15 | 2   |
| 2 | 17.81    | 2 | 2916.87  | 46.0801  | 3 | 2 | 15 | 2   |
| 2 | 6.135    | 1 | 1641.96  | 24.41    | 2 | 3 | 10 | 2   |
| 3 | 19.3     | 1 | 2188     | 39       | 4 | 3 | 6  | 1.8 |
| 3 | 17.95    | 1 | 1566     | 24       | 4 | 3 | 6  | 1.8 |
| 3 | 28.52    | 1 | 2228     | 35       | 4 | 3 | 6  | 1.8 |
| 2 | 6.763333 | 1 | 1359.307 | 22.13855 | 2 | 3 | 10 | 2   |
| 1 | 16.89    | 1 | 1686     | 22       | 4 | 3 | 6  | 1.8 |
| 2 | 6.79     | 1 | 1086.235 | 16.02117 | 3 | 2 | 15 | 2   |
| 2 | 5.375    | 1 | 975.29   | 12.48771 | 3 | 2 | 15 | 2   |
| 2 | 22.55    | 1 | 1657.533 | 28.43    | 1 | 3 | 15 | 2   |
| 3 | 11.42    | 2 | 1853     | 31       | 4 | 3 | 6  | 1.8 |
| 2 | 17.095   | 2 | 1359.715 | 20.66436 | 3 | 2 | 15 | 2   |
| 2 | 15.84    | 1 | 1679.737 | 25.29    | 1 | 3 | 15 | 2   |
| 1 | 22       | 1 | 1987     | 30       | 4 | 3 | 6  | 1.8 |
| 3 | 15.37    | 1 | 1442     | 27       | 4 | 3 | 6  | 1.8 |
| 1 | 25.19    | 1 | 2427     | 34       | 4 | 3 | 6  | 1.8 |
| 3 | 11.37    | 2 | 994      | 14       | 4 | 3 | 6  | 1.8 |
| 3 | 37.48    | 1 | 2018     | 27       | 4 | 3 | 6  | 1.8 |



| NAF_IPAQ | novo_sub_TMB | Goldberg_2EI_TMB | Sub_relato | IDADE    | ALEM_FUT | QUAL |     |
|----------|--------------|------------------|------------|----------|----------|------|-----|
| #NULL!   | 1            | 1812.896         | 1.12       | 0.6328   | 1        | 17   | 1 1 |
| #NULL!   | 1            | 2108.252         | 1.24       | 0.653307 | 1        | 17   | 2 9 |
| #NULL!   | 1            | 1952.615         | 1.3        | 0.474014 | 1        | 16   | 2 9 |
| #NULL!   | 1            | 1715.623         | 1.12       | 1.16356  | 2        | 15   | 1 4 |
| #NULL!   | 1            | 2037.508         | 1.24       | 0.979741 | 1        | 17   | 2 9 |
| #NULL!   | 1            | 1791.673         | 1.3        | 0.877729 | 1        | 19   | 1   |
| #NULL!   | 2            | 1765.144         | 1.3        | 1.366339 | 2        | 16   | 2 9 |
| #NULL!   | 2            | 1842.962         | 1.24       | 1.582708 | 2        | 17   | 1 4 |
| #NULL!   | 1            | 1952.615         | 1.24       | 1.210213 | 1        | 18   | 1 1 |
| #NULL!   | 1            | 1903.094         | 1.24       | 1.086165 | 1        | 17   | 1 2 |
| #NULL!   | 1            | 1662.565         | 1.24       | 0.987607 | 1        | 15   | 2 9 |
| #NULL!   | 2            | 1628.961         | 1.16       | 1.639081 | 2        | 14   | 1 1 |
| #NULL!   | 1            | 1706.78          | 1.3        | 0.832417 | 1        | 19   | 2 9 |
| #NULL!   | 1            | 1846.499         | 1.3        | 0.64169  | 1        | 16   | 2 9 |
| #NULL!   | 2            | 1901.326         | 1.16       | 1.8708   | 2        | 16   | 1 1 |
| #NULL!   | 1            | 1839.425         | 1.3        | 1.155477 | 1        | 19   | 2 9 |
| #NULL!   | 2            | 1777.524         | 1.3        | 1.626191 | 2        | 16   | 2 9 |
| #NULL!   | 1            | 1850.036         | 1.12       | 0.88755  | 1        | 17   | 2 9 |
| #NULL!   | 1            | 1865.954         | 1.24       | 0.828705 | 1        | 19   | 2 9 |
| #NULL!   | 2            | 1705.011         | 1.24       | 1.414527 | 2        | 18   | 2 9 |
| #NULL!   | 2            | 1896.02          | 1.3        | 2.491408 | 2        | 20   | 2 9 |
| #NULL!   | 2            | 1728.003         | 1.3        | 1.358092 | 2        | 17   | 2 9 |
| #NULL!   | 2            | 1846.499         | 1.3        | 1.479145 | 2        | 17   | 2 9 |
| #NULL!   | 1            | 1796.978         | 1.3        | 1.046902 | 1        | 17   | 2 9 |
| #NULL!   | 1            | 1791.673         | 1.3        | 1.04293  | 1        | 18   | 2 9 |
| #NULL!   | 2            | 1750.995         | 1.3        | 1.24348  | 1        | 18   | 2 9 |
| #NULL!   | 1            | 1678.482         | 1.3        | 0.945058 | 1        | 16   | 1 1 |
| #NULL!   | 1            | 1793.441         | 1.16       | 1.040458 | 2        | 19   | 1 1 |
| #NULL!   | 2            | 1627.193         | 1.16       | 1.229111 | 2        | 17   | 2 9 |
| #NULL!   | 2            | 1747.458         | 1.16       | 1.208613 | 2        | 18   | 1 2 |
| #NULL!   | 1            | 1743.92          | 1.3        | 0.779455 | 1        | 15   | 2 9 |
| #NULL!   | 1            | 1659.028         | 1.3        | 0.714201 | 1        | 14   | 2 9 |
| #NULL!   | 1            | 2016.285         | 1.3        | 0.766918 | 1        | 19   | 2 9 |
| #NULL!   | 1            | 1920.78          | 1.3        | 1.0878   | 1        | 18   | 2 9 |
| #NULL!   | 1            | 1966.764         | 1.3        | 0.495886 | 1        | 17   | 2 9 |
| #NULL!   | 1            | 1659.028         | 1.3        | 1.068662 | 1        | 16   | 1 2 |
| #NULL!   | 1            | 1673.176         | 1.3        | 1.178501 | 1        | 16   | 2 9 |
| #NULL!   | 1            | 2110.021         | 1.3        | 0.902761 | 1        | 17   | 1 1 |
| #NULL!   | 1            | 1989.756         | 1.3        | 1.065519 | 1        | 19   | 1 1 |
| #NULL!   | 1            | 1756.301         | 1.3        | 0.895407 | 1        | 16   | 2 9 |
| #NULL!   | 1            | 2150.698         | 1.24       | 0.50763  | 1        | 18   | 2 9 |
| #NULL!   | 1            | 1738.615         | 1.24       | 1.24582  | 2        | 17   | 1 4 |
| #NULL!   | 1            | 1873.028         | 1.24       | 1.026285 | 1        | 18   | 1 2 |
| #NULL!   | 1            | 1738.615         | 1.3        | 1.21967  | 1        | 18   | 1 1 |
| #NULL!   | 2            | 1977.376         | 1.3        | 1.392897 | 2        | 19   | 2 9 |
| #NULL!   | 1            | 1867.722         | 1.3        | 1.1494   | 1        | 18   | 2 9 |

|        |   |          |      |          |   |    |     |
|--------|---|----------|------|----------|---|----|-----|
| #NULL! | 1 | 1851.805 | 1.24 | 0.695268 | 1 | 16 | 2 9 |
| #NULL! | 1 | 2152.467 | 1.3  | 1.187716 | 1 | 16 | 2 9 |
| #NULL! | 1 | 1674.945 | 1.16 | 1.067498 | 1 | 16 | 1 2 |
| #NULL! | 2 | 1878.334 | 1.16 | 1.238331 | 2 | 18 | 2 9 |
| #NULL! | 1 | 1722.697 | 1.16 | 0.984503 | 1 | 17 | 1 2 |
| #NULL! | 1 | 1968.533 | 1.24 | 1.061412 | 1 | 16 | 2 9 |
| #NULL! | 1 | 1591.821 | 1.3  | 0.770304 | 1 | 16 | 2 9 |
| #NULL! | 1 | 1871.26  | 1.3  | 0.888215 | 1 | 16 | 2 9 |
| #NULL! | 1 | 2071.111 | 1.3  | 0.58246  | 1 | 19 | 2 9 |
| #NULL! | 2 | 1777.524 | 1.24 | 1.640974 | 2 | 17 | 2 9 |
| #NULL! | 1 | 1846.499 | 1.3  | 0.889229 | 1 | 19 | 2 9 |
| #NULL! | 2 | 1659.028 | 1.16 | 1.318845 | 2 | 16 | 2 9 |
| #NULL! | 1 | 1798.747 | 1.16 | 0.870606 | 1 | 18 | 2 9 |
| #NULL! | 2 | 1789.904 | 1.16 | 1.244759 | 2 | 17 | 1 1 |
| #NULL! | 1 | 1765.144 | 1.3  | 0.770083 | 1 | 17 | 2 9 |
| #NULL! | 1 | 1987.987 | 1.16 | 0.848094 | 1 | 15 | 2 9 |
| #NULL! | 1 | 1857.111 | 1.24 | 0.584906 | 1 | 18 | 1 1 |
| #NULL! | 1 | 2039.277 | 1.24 | 0.478253 | 1 | 16 | 1 4 |
| #NULL! | 1 | 1689.094 | 1.3  | 0.981315 | 1 | 17 | 1 3 |
| #NULL! | 1 | 1729.772 | 1.16 | 1.07124  | 1 | 17 | 1 1 |
| #NULL! | 1 | 1821.739 | 1.24 | 0.746383 | 1 | 17 | 2 9 |
| #NULL! | 1 | 1832.35  | 1.3  | 0.916711 | 1 | 19 | 2 9 |
| #NULL! | 1 | 1814.664 | 1.16 | 1.094968 | 1 | 18 | 1 1 |
| #NULL! | 1 | 1613.044 | 1.16 | 0.893962 | 1 | 14 | 2 9 |
| #NULL! | 2 | 1934.929 | 1.16 | 1.254309 | 2 | 18 | 1 1 |
| #NULL! | 1 | 1917.243 | 1.16 | 0.518453 | 1 | 17 | 1 1 |
| #NULL! | 1 | 2000.367 | 1.16 | 1.008815 | 1 | 15 | 1 2 |

| POS_JOGO | Pos_jogo_2 | Pos_jogo_3 | Posição_gc | TEMPO  | FOI_NUTRI | INFO_NUT | INF_NUT_C | ÁGUA_TRE |
|----------|------------|------------|------------|--------|-----------|----------|-----------|----------|
| 8        | 8          | 5          | 2          | 7      | 2         | 5        | 2         | 3        |
| 2        | 2          | 2          | 2          | 5      | 2         | 4        | 2         | 1        |
| 8        | 8          | 5          | 2          | 3      | 2         | 1        | 2         | 0.6      |
| 3        | 3          | 3          | 2          | 2      | 2         | 1        | 2         | 0.5      |
| 1        | 1          | 1          | 1          | 10     | 1         | 2        | 2         | 1.5      |
| 8        | 8          | 5          | 2          | 9      | 2         | 5        | 2         | 1        |
| 3        | 3          | 3          | 2          | 4      | 2         | 5        | 2         | 1        |
| 1        | 1          | 1          | 1          | 10     | 2         | 1        | 2         | 1        |
| 4        | 4          | 4          | 2          | 6      | 2         | 4        | 2         | 0.3      |
| 5        | 5          | 5          | 2          | 9      | 2         | 4        | 2         | 1        |
| 2        | 2          | 2          | 2          | 7      | 2         | 1        | 2         | 1        |
| 8        | 8          | 5          | 2          | 6      | 2         | 7        | 0         | 1        |
| 3        | 3          | 3          | 2          | 12     | 2         | 4        | 2         | 0.5      |
| 5        | 5          | 5          | 2          | 6      | 1         | 8        | 1         | 1        |
| 8        | 8          | 5          | 2          | 6      | 1         | 5        | 0         | 1        |
| 5        | 5          | 5          | 2          | 10     | 2         | 5        | 2         | 0.5      |
| 8        | 8          | 5          | 2          | 6      | 2         | 5        | 2         | 2        |
| 3        | 3          | 3          | 2          | 7      | 2         | 3        | 0         | 2        |
| 4        | 4          | 4          | 2          | 9      | 1         | 8        | 1         | 1        |
| 5        | 5          | 5          | 2          | 6      | 2         | 2        | 2         | 1        |
| 3        | 3          | 3          | 2          | 4      | 2         | 1        | 2         | 1        |
| 2        | 2          | 2          | 2          | 5      | 2         | 1        | 2         | 0.5      |
| 3        | 3          | 3          | 2          | 13     | 2         | 4        | 2         | 2        |
| 7        | 5          | 5          | 2          | 8      | 2         | 2        | 2         | 2        |
| 8        | 8          | 5          | 2          | 6      | 2         | 5        | 2         | 2        |
| 6        | 5          | 5          | 2          | 12     | 2         | 4        | 2         | 1.5      |
| 5        | 5          | 5          | 2          | 10     | 2         | 5        | 2         | 1        |
| 4        | 4          | 4          | 2          | 12     | 2         | 3        | 4         | 1        |
| 5        | 5          | 5          | 2          | 10     | 2         | 2        | 0         | 1        |
| 5        | 5          | 5          | 2          | 7      | 2         | 2        | 0         | 1        |
| 5        | 5          | 5          | 2          | 10     | 2         | 1        | 2         | 1        |
| 3        | 3          | 3          | 2          | 5      | 1         | 8        | 1         | 1        |
| 4        | 4          | 4          | 2          | 12     | 2         | 1        | 2         | 1.5      |
| 3        | 3          | 3          | 2          | 6      | 2         | 4        | 2         | 1        |
| 2        | 2          | 2          | 2          | #NULL! | 1         | 8        | 1         | 1        |
| 1        | 1          | 1          | 1          | 9      | 2         | 3        | 2         | 3        |
| 5        | 5          | 5          | 2          | 10     | 2         | 8        | 1         | 1        |
| 1        | 1          | 1          | 1          | 3      | 2         | 3        | 2         | 2        |
| 8        | 8          | 5          | 2          | 9      | 2         | 5        | 2         | 2        |
| 4        | 4          | 4          | 2          | 6      | 1         | 8        | 1         | 1.5      |
| 1        | 1          | 1          | 2          | 9      | 2         | 4        | 2         | 0.4      |
| 5        | 5          | 5          | 2          | 4      | 2         | 3        | 2         | 0.5      |
| 2        | 2          | 2          | 2          | 7      | 2         | 1        | 2         | 0.5      |
| 2        | 2          | 2          | 2          | 7      | 2         | 4        | 2         | 1        |
| 5        | 5          | 5          | 2          | 8      | 1         | 5        | 2         | 2        |
| 2        | 2          | 2          | 2          | 4      | 2         | 9        | 2         | 0.5      |

|   |   |   |   |    |   |   |   |     |
|---|---|---|---|----|---|---|---|-----|
| 4 | 4 | 4 | 2 | 8  | 2 | 4 | 2 | 1   |
| 1 | 1 | 1 | 1 | 5  | 2 | 4 | 2 | 1.5 |
| 3 | 3 | 3 | 2 | 8  | 2 | 7 | 0 | 1   |
| 2 | 2 | 2 | 2 | 7  | 2 | 3 | 4 | 2   |
| 4 | 4 | 4 | 2 | 6  | 2 | 3 | 0 | 1   |
| 8 | 8 | 5 | 2 | 6  | 2 | 1 | 2 | 1   |
| 5 | 5 | 5 | 2 | 6  | 2 | 7 | 2 | 1   |
| 2 | 2 | 2 | 2 | 9  | 1 | 5 | 2 | 1   |
| 4 | 4 | 4 | 2 | 10 | 2 | 5 | 2 | 1   |
| 8 | 8 | 5 | 2 | 10 | 2 | 5 | 2 | 0.5 |
| 5 | 5 | 5 | 2 | 10 | 2 | 5 | 2 | 1   |
| 3 | 3 | 3 | 2 | 11 | 2 | 1 | 0 | 1   |
| 4 | 4 | 4 | 2 | 7  | 2 | 5 | 0 | 1   |
| 2 | 2 | 2 | 2 | 7  | 2 | 4 | 0 | 1   |
| 4 | 4 | 4 | 2 | 10 | 1 | 5 | 2 | 1   |
| 2 | 2 | 2 | 2 | 5  | 2 | 1 | 0 | 1   |
| 8 | 8 | 5 | 2 | 9  | 2 | 4 | 2 | 1   |
| 8 | 8 | 5 | 2 | 6  | 1 | 5 | 2 | 1.5 |
| 4 | 4 | 4 | 2 | 7  | 2 | 3 | 2 | 1   |
| 3 | 3 | 3 | 2 | 8  | 2 | 1 | 0 | 1   |
| 3 | 3 | 3 | 2 | 3  | 2 | 5 | 2 | 0.5 |
| 4 | 4 | 4 | 2 | 8  | 2 | 1 | 2 | 2   |
| 4 | 4 | 4 | 2 | 4  | 2 | 4 | 5 | 2   |
| 8 | 8 | 5 | 2 | 5  | 2 | 3 | 0 | 1   |
| 8 | 8 | 5 | 2 | 8  | 2 | 3 | 0 | 1   |
| 1 | 1 | 1 | 1 | 9  | 2 | 9 | 0 | 1   |
| 1 | 1 | 1 | 1 | 4  | 2 | 6 | 0 | 1   |

| ÁGUA_DIA | REFEIÇÃO_Adeq_refei | DIFICULDA | HORÁRIO_VIDA_CORI | FORÇA_VO | N_MUDAR | HABILIDAD |
|----------|---------------------|-----------|-------------------|----------|---------|-----------|
| 7        | 2                   | 2 #NULL!  | 2                 | 2        | 2       | 2         |
| 6        | 3                   | 1 #NULL!  | 2                 | 2        | 2       | 2         |
| 2        | 3                   | 1 #NULL!  | 2                 | 2        | 2       | 2         |
| 3        | 3                   | 1 #NULL!  | 2                 | 2        | 2       | 2         |
| 2.5      | 2                   | 2 #NULL!  | 2                 | 2        | 2       | 2         |
| 2        | 2                   | 2 #NULL!  | 2                 | 2        | 2       | 2         |
| 2        | 2                   | 2 #NULL!  | 2                 | 2        | 2       | 2         |
| 2        | 2                   | 2 #NULL!  | 2                 | 2        | 2       | 2         |
| 3.5      | 3                   | 1 #NULL!  | 2                 | 2        | 2       | 2         |
| 2.5      | 3                   | 1 #NULL!  | 2                 | 2        | 1       | 2         |
| 1        | 3                   | 1 #NULL!  | 2                 | 2        | 1       | 2         |
| 3        | 1                   | 2 #NULL!  | 2                 | 2        | 2       | 2         |
| 2.5      | 1                   | 2 #NULL!  | 2                 | 1        | 2       | 2         |
| 2        | 3                   | 1 #NULL!  | 2                 | 2        | 2       | 2         |
| 2        | 3                   | 1 #NULL!  | 2                 | 2        | 2       | 2         |
| 1.5      | 2                   | 2 #NULL!  | 2                 | 2        | 2       | 1         |
| 5        | 2                   | 2 #NULL!  | 2                 | 1        | 2       | 2         |
| 3        | 1                   | 2 #NULL!  | 2                 | 2        | 2       | 2         |
| 2        | 1                   | 2 #NULL!  | 2                 | 2        | 1       | 2         |
| 2        | 3                   | 1 #NULL!  | 2                 | 2        | 2       | 2         |
| 2.5      | 2                   | 2 #NULL!  | 2                 | 2        | 2       | 2         |
| 1        | 2                   | 2 #NULL!  | 2                 | 2        | 2       | 2         |
| 3        | 1                   | 2 #NULL!  | 2                 | 1        | 2       | 2         |
| 5        | 3                   | 1 #NULL!  | 2                 | 2        | 2       | 1         |
| 6        | 1                   | 2 #NULL!  | 2                 | 2        | 2       | 2         |
| 2.5      | 2                   | 2 #NULL!  | 2                 | 1        | 2       | 2         |
| 2.5      | 3                   | 1 #NULL!  | 2                 | 2        | 2       | 2         |
| 3        | 1                   | 2 #NULL!  | 2                 | 2        | 2       | 2         |
| 2        | 1                   | 2 #NULL!  | 2                 | 1        | 2       | 2         |
| 2        | 2                   | 2 #NULL!  | 2                 | 2        | 2       | 1         |
| 2        | 2                   | 2 #NULL!  | 2                 | 2        | 1       | 2         |
| 1.2      | 2                   | 2 #NULL!  | 2                 | 2        | 1       | 2         |
| 2        | 2                   | 2 #NULL!  | 2                 | 2        | 2       | 2         |
| 2        | 1                   | 2 #NULL!  | 2                 | 2        | 2       | 2         |
| 2        | 2                   | 2 #NULL!  | 2                 | 2        | 2       | 1         |
| 4        | 2                   | 2 #NULL!  | 2                 | 2        | 2       | 2         |
| 2        | 1                   | 2 #NULL!  | 2                 | 2        | 2       | 2         |
| 3        | 2                   | 2 #NULL!  | 2                 | 2        | 2       | 2         |
| 1.5      | 1                   | 2 #NULL!  | 2                 | 2        | 2       | 2         |
| 2        | 2                   | 2 #NULL!  | 2                 | 2        | 2       | 2         |
| 2        | 3                   | 1 #NULL!  | 2                 | 2        | 1       | 2         |
| 5        | 2                   | 2 #NULL!  | 2                 | 2        | 2       | 2         |
| 1.5      | 2                   | 2 #NULL!  | 2                 | 2        | 1       | 2         |
| 2        | 3                   | 1 #NULL!  | 2                 | 1        | 2       | 2         |
| 2        | 2                   | 2 #NULL!  | 2                 | 2        | 1       | 1         |
| 1        | 2                   | 2 #NULL!  | 2                 | 2        | 2       | 1         |

|     |   |          |   |   |   |   |   |
|-----|---|----------|---|---|---|---|---|
| 2   | 3 | 1 #NULL! | 2 | 1 | 2 | 2 | 2 |
| 2.5 | 3 | 1 #NULL! | 2 | 2 | 2 | 2 | 1 |
| 2   | 1 | 2 #NULL! | 2 | 1 | 2 | 2 | 2 |
| 3   | 2 | 2 #NULL! | 2 | 2 | 2 | 2 | 1 |
| 4   | 3 | 1 #NULL! | 2 | 2 | 2 | 1 | 2 |
| 2   | 2 | 2 #NULL! | 2 | 2 | 1 | 2 | 2 |
| 2   | 2 | 2 #NULL! | 2 | 2 | 1 | 2 | 2 |
| 1.5 | 2 | 2 #NULL! | 2 | 1 | 2 | 2 | 2 |
| 3   | 2 | 2 #NULL! | 2 | 2 | 2 | 2 | 2 |
| 2.5 | 2 | 2 #NULL! | 2 | 2 | 1 | 2 | 2 |
| 2   | 3 | 1 #NULL! | 2 | 1 | 2 | 2 | 1 |
| 3   | 2 | 2 #NULL! | 2 | 2 | 2 | 2 | 1 |
| 3   | 1 | 2 #NULL! | 2 | 2 | 2 | 2 | 1 |
| 2   | 3 | 1 #NULL! | 2 | 2 | 2 | 2 | 2 |
| 2.5 | 3 | 1 #NULL! | 2 | 1 | 2 | 2 | 2 |
| 4   | 2 | 2 #NULL! | 2 | 2 | 2 | 2 | 1 |
| 2   | 2 | 2 #NULL! | 1 | 2 | 1 | 2 | 2 |
| 2   | 2 | 2 #NULL! | 1 | 2 | 2 | 2 | 2 |
| 1   | 3 | 1 #NULL! | 2 | 1 | 2 | 2 | 2 |
| 2   | 2 | 2 #NULL! | 2 | 2 | 2 | 2 | 1 |
| 1.5 | 2 | 2 #NULL! | 2 | 1 | 1 | 2 | 2 |
| 5   | 2 | 2 #NULL! | 2 | 2 | 1 | 2 | 2 |
| 3   | 3 | 1 #NULL! | 2 | 2 | 1 | 2 | 2 |
| 2   | 2 | 2 #NULL! | 2 | 1 | 2 | 2 | 1 |
| 5   | 3 | 1 #NULL! | 2 | 2 | 2 | 1 | 2 |
| 3   | 2 | 2 #NULL! | 2 | 2 | 1 | 2 | 2 |
| 2   | 2 | 2 #NULL! | 1 | 1 | 2 | 2 | 1 |













|   |   |   |   |   |   |   |   |   |
|---|---|---|---|---|---|---|---|---|
| 2 | 2 | 1 | 1 | 1 | 3 | 3 | 2 | 1 |
| 2 | 1 | 1 | 1 | 4 | 3 | 3 | 3 | 2 |
| 2 | 4 | 4 | 4 | 4 | 3 | 1 | 3 | 2 |
| 2 | 3 | 1 | 1 | 4 | 3 | 3 | 3 | 2 |
| 2 | 3 | 1 | 1 | 1 | 3 | 3 | 3 | 2 |
| 2 | 2 | 1 | 1 | 1 | 4 | 3 | 3 | 1 |
| 2 | 2 | 1 | 1 | 1 | 3 | 3 | 3 | 2 |
| 2 | 1 | 3 | 3 | 2 | 3 | 1 | 3 | 2 |
| 2 | 2 | 1 | 1 | 1 | 4 | 4 | 4 | 1 |
| 2 | 4 | 4 | 1 | 1 | 3 | 3 | 4 | 1 |
| 2 | 2 | 1 | 1 | 1 | 3 | 3 | 3 | 1 |
| 2 | 2 | 4 | 1 | 2 | 3 | 1 | 3 | 2 |
| 2 | 4 | 4 | 4 | 4 | 3 | 4 | 3 | 1 |
| 2 | 4 | 4 | 1 | 4 | 3 | 3 | 3 | 2 |
| 2 | 2 | 1 | 1 | 1 | 3 | 3 | 3 | 1 |
| 2 | 4 | 1 | 1 | 1 | 3 | 1 | 3 | 2 |
| 2 | 2 | 1 | 1 | 1 | 3 | 3 | 3 | 1 |
| 2 | 2 | 1 | 1 | 4 | 3 | 3 | 3 | 2 |
| 2 | 4 | 4 | 4 | 4 | 3 | 1 | 3 | 2 |
| 3 | 2 | 1 | 1 | 4 | 3 | 3 | 1 | 2 |
| 2 | 2 | 1 | 1 | 1 | 3 | 3 | 3 | 1 |
| 2 | 1 | 1 | 1 | 1 | 3 | 1 | 3 | 2 |
| 3 | 2 | 1 | 1 | 1 | 3 | 3 | 3 | 2 |
| 2 | 4 | 4 | 1 | 1 | 3 | 4 | 3 | 1 |
| 2 | 2 | 4 | 1 | 1 | 4 | 3 | 3 | 2 |
| 2 | 2 | 1 | 1 | 4 | 3 | 3 | 3 | 2 |
| 2 | 2 | 1 | 3 | 1 | 3 | 3 | 3 | 2 |





| Q13 | Q14 | Q15 | Q16 | Q17 | Q18 | Q19 | Q20 | Q21 |   |
|-----|-----|-----|-----|-----|-----|-----|-----|-----|---|
| 0   | 1   | 0   | 2   | 0   | 0   | 0   | 1   | 1   | 1 |
| 0   | 1   | 2   | 0   | 0   | 0   | 0   | 0   | 0   | 1 |
| 0   | 1   | 2   | 2   | 2   | 2   | 0   | 1   | 0   | 1 |
| 0   | 1   | 0   | 0   | 0   | 0   | 0   | 0   | 1   | 1 |
| 0   | 1   | 0   | 0   | 1   | 0   | 0   | 0   | 0   | 1 |
| 0   | 1   | 0   | 2   | 0   | 0   | 0   | 0   | 0   | 1 |
| 1   | 1   | 0   | 1   | 2   | 1   | 0   | 0   | 1   | 1 |
| 0   | 2   | 0   | 2   | 2   | 0   | 2   | 2   | 0   | 1 |
| 0   | 1   | 0   | 0   | 0   | 0   | 0   | 0   | 0   | 1 |
| 0   | 1   | 0   | 0   | 0   | 0   | 0   | 1   | 0   | 1 |
| 1   | 2   | 1   | 1   | 0   | 0   | 0   | 0   | 1   | 1 |
| 0   | 0   | 0   | 0   | 0   | 0   | 1   | 1   | 1   | 1 |
| 0   | 1   | 0   | 1   | 1   | 0   | 0   | 0   | 0   | 1 |
| 0   | 1   | 0   | 0   | 1   | 0   | 0   | 0   | 0   | 1 |
| 0   | 1   | 0   | 0   | 1   | 0   | 0   | 1   | 0   | 1 |
| 0   | 1   | 0   | 0   | 0   | 1   | 0   | 1   | 0   | 1 |
| 0   | 1   | 1   | 0   | 2   | 0   | 0   | 0   | 0   | 1 |
| 0   | 0   | 0   | 0   | 0   | 0   | 1   | 1   | 0   | 1 |
| 1   | 1   | 0   | 0   | 0   | 0   | 0   | 0   | 0   | 1 |
| 0   | 1   | 2   | 2   | 1   | 0   | 0   | 0   | 0   | 1 |
| 0   | 1   | 1   | 0   | 0   | 0   | 0   | 1   | 0   | 1 |
| 0   | 1   | 0   | 0   | 0   | 0   | 0   | 0   | 0   | 1 |
| 1   | 1   | 1   | 0   | 0   | 0   | 0   | 1   | 0   | 1 |
| 1   | 1   | 0   | 2   | 2   | 2   | 2   | 0   | 0   | 2 |
| 1   | 1   | 1   | 2   | 0   | 0   | 0   | 1   | 2   | 2 |
| 1   | 2   | 2   | 1   | 1   | 0   | 0   | 2   | 2   | 1 |
| 0   | 1   | 1   | 0   | 0   | 0   | 0   | 1   | 0   | 1 |
| 0   | 1   | 0   | 0   | 2   | 0   | 0   | 0   | 0   | 1 |
| 0   | 1   | 1   | 0   | 1   | 1   | 1   | 0   | 0   | 1 |
| 0   | 1   | 0   | 0   | 0   | 0   | 0   | 1   | 0   | 1 |
| 0   | 1   | 0   | 0   | 0   | 0   | 0   | 1   | 0   | 1 |
| 0   | 1   | 0   | 1   | 1   | 0   | 0   | 0   | 0   | 1 |
| 0   | 1   | 2   | 2   | 1   | 0   | 0   | 0   | 0   | 1 |
| 0   | 1   | 0   | 0   | 0   | 0   | 0   | 1   | 0   | 1 |
| 0   | 1   | 0   | 0   | 0   | 0   | 0   | 1   | 0   | 1 |
| 2   | 2   | 9   | 9   | 9   | 9   | 9   | 9   | 9   | 9 |
| 0   | 1   | 0   | 1   | 0   | 0   | 0   | 1   | 0   | 1 |
| 0   | 1   | 2   | 0   | 0   | 0   | 0   | 0   | 0   | 1 |
| 0   | 0   | 0   | 0   | 1   | 1   | 0   | 0   | 0   | 0 |
| 1   | 1   | 2   | 1   | 2   | 2   | 0   | 0   | 1   | 1 |
| 0   | 1   | 1   | 0   | 1   | 0   | 1   | 1   | 0   | 1 |
| 0   | 1   | 0   | 0   | 0   | 0   | 0   | 0   | 0   | 1 |
| 0   | 1   | 0   | 0   | 0   | 0   | 0   | 0   | 0   | 1 |
| 1   | 2   | 2   | 2   | 0   | 0   | 0   | 1   | 1   | 1 |
| 0   | 2   | 0   | 0   | 2   | 0   | 0   | 2   | 1   | 2 |
| 0   | 1   | 1   | 2   | 0   | 0   | 0   | 1   | 0   | 1 |
| 1   | 1   | 1   | 0   | 0   | 1   | 0   | 0   | 1   | 1 |

|   |   |   |   |   |   |   |   |   |
|---|---|---|---|---|---|---|---|---|
| 0 | 1 | 0 | 0 | 1 | 0 | 0 | 0 | 1 |
| 0 | 1 | 0 | 1 | 0 | 0 | 1 | 0 | 1 |
| 0 | 1 | 0 | 0 | 0 | 1 | 0 | 1 | 0 |
| 0 | 0 | 1 | 0 | 0 | 0 | 0 | 0 | 1 |
| 1 | 1 | 1 | 0 | 1 | 0 | 1 | 0 | 1 |
| 0 | 1 | 2 | 2 | 1 | 0 | 0 | 0 | 1 |
| 0 | 1 | 0 | 1 | 0 | 0 | 1 | 0 | 1 |
| 0 | 1 | 0 | 1 | 0 | 0 | 0 | 1 | 0 |
| 0 | 1 | 1 | 2 | 2 | 0 | 2 | 0 | 1 |
| 0 | 1 | 0 | 2 | 0 | 0 | 2 | 0 | 1 |
| 0 | 2 | 0 | 0 | 0 | 0 | 0 | 2 | 1 |
| 1 | 1 | 1 | 1 | 1 | 1 | 1 | 1 | 1 |
| 1 | 0 | 0 | 2 | 1 | 1 | 0 | 2 | 1 |
| 0 | 2 | 0 | 2 | 0 | 1 | 1 | 0 | 1 |
| 0 | 1 | 0 | 0 | 0 | 0 | 0 | 0 | 1 |
| 0 | 1 | 0 | 0 | 0 | 0 | 0 | 0 | 1 |
| 0 | 1 | 1 | 0 | 0 | 0 | 0 | 1 | 1 |
| 1 | 1 | 1 | 1 | 2 | 1 | 0 | 0 | 1 |
| 0 | 2 | 0 | 0 | 1 | 0 | 1 | 0 | 1 |
| 0 | 1 | 0 | 1 | 1 | 0 | 1 | 2 | 1 |
| 0 | 1 | 0 | 1 | 2 | 2 | 1 | 0 | 1 |
| 1 | 2 | 1 | 2 | 0 | 1 | 1 | 0 | 2 |
| 0 | 1 | 0 | 0 | 2 | 2 | 0 | 0 | 1 |
| 1 | 2 | 0 | 2 | 0 | 0 | 0 | 2 | 1 |
| 0 | 1 | 0 | 0 | 0 | 0 | 0 | 0 | 1 |
| 0 | 1 | 0 | 0 | 1 | 0 | 0 | 0 | 1 |
| 0 | 1 | 1 | 0 | 0 | 0 | 1 | 1 | 1 |



| Nota_prop | Nota_prop | Nota_final | Nota_prop | class_nk | Nota_prop | Nota_prop | Antilog_PT | Class_antik |
|-----------|-----------|------------|-----------|----------|-----------|-----------|------------|-------------|
| 100       | 60        | 15         | 57.69231  | 2        | 12.5      | 5750      | 0.680822   | 2           |
| 50        | 90        | 14         | 53.84615  | 2        | 12.5      | 5083.333  | 0.767134   | 2           |
| 87.5      | 60        | 14         | 53.84615  | 2        | 12.5      | 5333.333  | 1.05508    | 2           |
| 87.5      | 90        | 17         | 65.38462  | 1        | 12.5      | 6333.333  | 0.873587   | 2           |
| 25        | 80        | 12         | 46.15385  | 2        | 25        | 4333.333  | 1.958899   | 1           |
| 75        | 80        | 15         | 57.69231  | 2        | 12.5      | 5583.333  | 1.130089   | 2           |
| 50        | 50        | 10         | 38.46154  | 2        | 12.5      | 3750      | 1.349218   | 1           |
| 87.5      | 50        | 13         | 50        | 2        | 12.5      | 5000      | 0.607083   | 2           |
| 100       | 100       | 19         | 73.07692  | 1        | 12.5      | 7083.333  | 1.239249   | 1           |
| 100       | 90        | 18         | 69.23077  | 1        | 12.5      | 6750      | 0.977053   | 2           |
| 62.5      | 40        | 10         | 38.46154  | 2        | 12.5      | 3833.333  | 1.862884   | 1           |
| 50        | 60        | 11         | 42.30769  | 2        | 12.5      | 4083.333  | 1.814454   | 1           |
| 87.5      | 80        | 17         | 65.38462  | 1        | 25        | 6416.667  | 2.340967   | 1           |
| 100       | 90        | 18         | 69.23077  | 1        | 12.5      | 6750      | 3.314369   | 1           |
| 62.5      | 80        | 14         | 53.84615  | 2        | 12.5      | 5166.667  | 1.2681     | 1           |
| 100       | 80        | 17         | 65.38462  | 1        | 12.5      | 6416.667  | 1.216269   | 1           |
| 75        | 60        | 13         | 50        | 2        | 12.5      | 4916.667  | 0.951358   | 2           |
| 62.5      | 90        | 15         | 57.69231  | 2        | 12.5      | 5500      | 1.191526   | 2           |
| 87.5      | 70        | 17         | 65.38462  | 1        | 37.5      | 6500      | 1.821917   | 1           |
| 87.5      | 70        | 15         | 57.69231  | 2        | 12.5      | 5666.667  | 1.126075   | 2           |
| 100       | 100       | 19         | 73.07692  | 1        | 12.5      | 7083.333  | 1.724612   | 1           |
| 87.5      | 60        | 14         | 53.84615  | 2        | 12.5      | 5333.333  | 1.614651   | 1           |
| 87.5      | 40        | 12         | 46.15385  | 2        | 12.5      | 4666.667  | 1.307443   | 1           |
| 37.5      | 30        | 7          | 26.92308  | 2        | 12.5      | 2666.667  | 1.433625   | 1           |
| 25        | 20        | 5          | 19.23077  | 2        | 12.5      | 1916.667  | 1.310031   | 1           |
| 100       | 80        | 17         | 65.38462  | 1        | 12.5      | 6416.667  | 1.772169   | 1           |
| 62.5      | 80        | 14         | 53.84615  | 2        | 12.5      | 5166.667  | 1.146849   | 2           |
| 75        | 70        | 14         | 53.84615  | 2        | 12.5      | 5250      | 2.050075   | 1           |
| 87.5      | 80        | 16         | 61.53846  | 1        | 12.5      | 6000      | 1.613499   | 1           |
| 37.5      | 90        | 13         | 50        | 2        | 12.5      | 4666.667  | 1.5364     | 1           |
| 100       | 70        | 18         | 69.23077  | 1        | 37.5      | 6916.667  | 1.802533   | 1           |
| 87.5      | 70        | 15         | 57.69231  | 2        | 12.5      | 5666.667  | 1.839457   | 1           |
| 100       | 80        | 20         | 76.92308  | 1        | 37.5      | 7250      | 2.073591   | 1           |
| 100       | 80        | 18         | 69.23077  | 1        | 25        | 6833.333  | 1.796651   | 1           |
| 75        | 0         | 9          | 34.61539  | 2        | 25        | 3333.333  | 2.628498   | 1           |
| 100       | 70        | 16         | 61.53846  | 1        | 12.5      | 6083.333  | 1.352101   | 1           |
| 75        | 90        | 16         | 61.53846  | 1        | 12.5      | 5916.667  | 1.575987   | 1           |
| 100       | 60        | 15         | 57.69231  | 2        | 12.5      | 5750      | 0.810359   | 2           |
| 62.5      | 40        | 10         | 38.46154  | 2        | 12.5      | 3833.333  | 0.288149   | 2           |
| 100       | 60        | 15         | 57.69231  | 2        | 12.5      | 5750      | 1.640442   | 1           |
| 87.5      | 100       | 19         | 73.07692  | 1        | 25        | 7083.333  | 0.713755   | 2           |
| 100       | 100       | 19         | 73.07692  | 1        | 12.5      | 7083.333  | 1.238203   | 1           |
| 62.5      | 40        | 10         | 38.46154  | 2        | 12.5      | 3833.333  | 1.021799   | 2           |
| 25        | 50        | 8          | 30.76923  | 2        | 12.5      | 2916.667  | 1.273318   | 1           |
| 75        | 70        | 14         | 53.84615  | 2        | 12.5      | 5250      | 1.096334   | 2           |
| 25        | 50        | 8          | 30.76923  | 2        | 12.5      | 2916.667  | 1.737497   | 1           |

|      |     |    |          |   |      |          |          |   |
|------|-----|----|----------|---|------|----------|----------|---|
| 87.5 | 90  | 20 | 76.92308 | 1 | 37.5 | 7166.667 | 1.105014 | 2 |
| 75   | 80  | 15 | 57.69231 | 2 | 12.5 | 5583.333 | 1.288015 | 1 |
| 37.5 | 70  | 11 | 42.30769 | 2 | 12.5 | 4000     | 1.16594  | 2 |
| 75   | 80  | 15 | 57.69231 | 2 | 12.5 | 5583.333 | 1.888499 | 1 |
| 87.5 | 60  | 14 | 53.84615 | 2 | 12.5 | 5333.333 | 1.482896 | 1 |
| 87.5 | 70  | 17 | 65.38462 | 1 | 37.5 | 6500     | 1.258156 | 1 |
| 100  | 70  | 16 | 61.53846 | 1 | 12.5 | 6083.333 | 1.123402 | 2 |
| 37.5 | 60  | 10 | 38.46154 | 2 | 12.5 | 3666.667 | 0.561267 | 2 |
| 62.5 | 50  | 10 | 38.46154 | 2 | 0    | 3750     | 0.746538 | 2 |
| 62.5 | 70  | 13 | 50       | 2 | 12.5 | 4833.333 | 1.078198 | 2 |
| 100  | 70  | 20 | 76.92308 | 1 | 50   | 7333.333 | 3.313314 | 1 |
| 62.5 | 30  | 9  | 34.61539 | 2 | 12.5 | 3500     | 1.594125 | 1 |
| 37.5 | 40  | 7  | 26.92308 | 2 | 0    | 2583.333 | 1.185682 | 2 |
| 62.5 | 60  | 12 | 46.15385 | 2 | 12.5 | 4500     | 1.299265 | 1 |
| 100  | 90  | 19 | 73.07692 | 1 | 25   | 7166.667 | 1.732629 | 1 |
| 75   | 100 | 17 | 65.38462 | 1 | 12.5 | 6250     | 1.063566 | 2 |
| 100  | 70  | 19 | 73.07692 | 1 | 37.5 | 6916.667 | 1.019537 | 2 |
| 87.5 | 40  | 12 | 46.15385 | 2 | 12.5 | 4666.667 | 1.063974 | 2 |
| 37.5 | 70  | 11 | 42.30769 | 2 | 12.5 | 4000     | 1.88365  | 1 |
| 62.5 | 60  | 12 | 46.15385 | 2 | 12.5 | 4500     | 0.919566 | 2 |
| 100  | 60  | 16 | 61.53846 | 1 | 25   | 6166.667 | 1.084649 | 2 |
| 75   | 20  | 9  | 34.61539 | 2 | 12.5 | 3583.333 | 0.879201 | 2 |
| 87.5 | 70  | 15 | 57.69231 | 2 | 12.5 | 5666.667 | 1.551304 | 1 |
| 62.5 | 60  | 14 | 53.84615 | 2 | 37.5 | 5333.333 | 1.763952 | 1 |
| 75   | 100 | 17 | 65.38462 | 1 | 12.5 | 6250     | 1.825804 | 1 |
| 87.5 | 90  | 17 | 65.38462 | 1 | 12.5 | 6333.333 | 1.105436 | 2 |
| 87.5 | 70  | 15 | 57.69231 | 2 | 12.5 | 5666.667 | 1.920646 | 1 |

| Antilog_CA | Class_antik | Antilog_LIP | Class_antik | Antilog_SA | Class_antik | Antilog_MC | Class_antik | Antilog_PO |
|------------|-------------|-------------|-------------|------------|-------------|------------|-------------|------------|
| 4.514158   | 2           | 25.70835    | 1           | 1.117899   | 1           | 1.121974   | 2           | 0.551952   |
| 8.032848   | 1           | 14.30076    | 2           | 4.14223    | 1           | 3.661256   | 2           | 1.185886   |
| 2.596151   | 2           | 54.00378    | 1           | 4.997338   | 1           | 4.409846   | 2           | 2.704175   |
| 1.752284   | 2           | 24.06719    | 2           | 2.340159   | 1           | 1.722735   | 2           | 0.261294   |
| 3.021138   | 2           | 18.79374    | 2           | 8.588759   | 1           | 7.834477   | 2           | 2.286323   |
| 2.930565   | 2           | 38.29246    | 1           | 11.1416    | 2           | 10.77853   | 1           | 3.044751   |
| 2.747053   | 2           | 26.99646    | 1           | 6.727388   | 1           | 7.105076   | 2           | 2.249139   |
| 1.365683   | 2           | 7.482988    | 2           | 0.916868   | 1           | 0.913367   | 2           | 0.039149   |
| 3.637408   | 2           | 20.40764    | 2           | 5.662487   | 1           | 4.831768   | 2           | 2.202117   |
| 4.172545   | 2           | 19.67728    | 2           | 2.063222   | 1           | 2.082057   | 2           | 0.643967   |
| 4.636378   | 2           | 17.61534    | 2           | 3.858024   | 1           | 3.664421   | 2           | 1.95588    |
| 4.584999   | 2           | 20.56465    | 2           | 9.997961   | 2           | 9.966827   | 2           | 5.234706   |
| 3.31395    | 2           | 24.79353    | 2           | 5.742449   | 1           | 5.282223   | 2           | 3.101522   |
| 6.607119   | 1           | 40.24437    | 1           | 28.60023   | 2           | 22.78013   | 1           | 5.782948   |
| 4.101272   | 2           | 15.65755    | 2           | 10.16669   | 2           | 10.1118    | 1           | 3.945578   |
| 4.315168   | 2           | 17.81023    | 2           | 16.37271   | 2           | 6.474336   | 2           | 2.454203   |
| 4.791227   | 2           | 11.82425    | 2           | 6.497734   | 1           | 6.13237    | 2           | 3.064701   |
| 3.5789     | 2           | 28.77991    | 1           | 10.23877   | 2           | 10.24666   | 1           | 5.171415   |
| 3.71993    | 2           | 14.18796    | 2           | 3.095203   | 1           | 3.280729   | 2           | 1.413951   |
| 4.31061    | 2           | 25.46146    | 1           | 6.825901   | 1           | 7.64282    | 2           | 5.499118   |
| 5.162907   | 1           | 6.680323    | 2           | 4.634654   | 1           | 3.896872   | 2           | 2.018901   |
| 4.54044    | 2           | 17.97416    | 2           | 6.262594   | 1           | 7.589857   | 2           | 5.54237    |
| 4.895054   | 2           | 11.32321    | 2           | 8.987349   | 1           | 6.259258   | 2           | 3.630823   |
| 3.234131   | 2           | 32.81716    | 1           | 11.19059   | 2           | 13.31832   | 1           | 6.619334   |
| 4.147639   | 2           | 22.44183    | 2           | 8.507326   | 1           | 8.825107   | 2           | 4.394609   |
| 3.827306   | 2           | 22.79017    | 2           | 8.680696   | 1           | 9.614268   | 2           | 7.033662   |
| 4.547871   | 2           | 28.21413    | 1           | 9.703213   | 1           | 6.487804   | 2           | 2.334256   |
| 3.547981   | 2           | 18.67406    | 2           | 6.946063   | 1           | 6.944308   | 2           | 4.945053   |
| 4.284566   | 2           | 26.87149    | 1           | 11.70693   | 2           | 11.69748   | 1           | 3.861175   |
| 3.596852   | 2           | 27.75803    | 1           | 11.55168   | 2           | 12.49877   | 1           | 5.682355   |
| 3.460105   | 2           | 28.98514    | 1           | 2.303104   | 1           | 2.545583   | 2           | 1.365686   |
| 3.727094   | 2           | 31.21227    | 1           | 3.130905   | 1           | 3.620499   | 2           | 1.61452    |
| 3.46969    | 2           | 37.8417     | 1           | 19.04051   | 2           | 16.6423    | 1           | 2.848373   |
| 2.330762   | 2           | 22.98202    | 2           | 8.018936   | 1           | 8.258817   | 2           | 3.030108   |
| 4.609392   | 2           | 49.15951    | 1           | 19.48364   | 2           | 21.414     | 1           | 11.98786   |
| 4.145324   | 2           | 31.25316    | 1           | 12.61407   | 2           | 12.17732   | 1           | 4.359881   |
| 4.706951   | 2           | 25.60216    | 1           | 9.647453   | 1           | 6.765179   | 2           | 3.289838   |
| 2.530622   | 2           | 12.22841    | 2           | 8.964083   | 1           | 9.39554    | 2           | 5.443446   |
| 3.190193   | 2           | 8.432214    | 2           | 7.398636   | 1           | 7.063024   | 2           | 2.971028   |
| 4.542214   | 2           | 13.35399    | 2           | 2.534997   | 1           | 2.87378    | 2           | 1.221899   |
| 2.451628   | 2           | 53.08045    | 1           | 10.83266   | 2           | 8.019921   | 2           | 3.048966   |
| 4.650558   | 2           | 20.10696    | 2           | 5.249947   | 1           | 5.103433   | 2           | 2.964403   |
| 4.426296   | 2           | 17.38235    | 2           | 6.035485   | 1           | 6.078627   | 2           | 1.810144   |
| 4.314427   | 2           | 23.44008    | 2           | 11.30177   | 2           | 9.548094   | 2           | 3.893431   |
| 3.440234   | 2           | 21.76721    | 2           | 11.3802    | 2           | 7.341007   | 2           | 1.534089   |
| 3.610446   | 2           | 19.35358    | 2           | 8.941783   | 1           | 7.243579   | 2           | 4.196508   |

|          |   |          |   |          |   |          |   |          |
|----------|---|----------|---|----------|---|----------|---|----------|
| 3.416676 | 2 | 36.12153 | 1 | 2.644051 | 1 | 1.660994 | 2 | 0.23617  |
| 2.559678 | 2 | 24.84499 | 2 | 11.09263 | 2 | 12.52931 | 1 | 6.109006 |
| 4.33898  | 2 | 29.60598 | 1 | 12.03276 | 2 | 12.03383 | 1 | 5.019511 |
| 2.845078 | 2 | 25.68333 | 1 | 14.10217 | 2 | 12.19727 | 1 | 2.746805 |
| 3.865368 | 2 | 28.85918 | 1 | 9.142125 | 1 | 11.17943 | 1 | 6.135814 |
| 7.100031 | 1 | 23.75419 | 2 | 4.748424 | 1 | 5.656505 | 2 | 4.586109 |
| 4.631125 | 2 | 37.37954 | 1 | 12.12673 | 2 | 9.4113   | 2 | 3.834211 |
| 4.849966 | 2 | 17.51705 | 2 | 7.02392  | 1 | 6.420193 | 2 | 4.796019 |
| 3.221108 | 2 | 36.69012 | 1 | 12.33548 | 2 | 9.234853 | 2 | 3.008475 |
| 4.492644 | 2 | 19.17685 | 2 | 2.673233 | 1 | 2.745039 | 2 | 1.017862 |
| 5.471176 | 1 | 26.95362 | 1 | 12.37914 | 2 | 11.62113 | 1 | 4.251912 |
| 4.771622 | 2 | 19.9666  | 2 | 7.634707 | 1 | 8.575948 | 2 | 4.677065 |
| 3.719128 | 2 | 32.03849 | 1 | 12.43    | 2 | 11.40728 | 1 | 3.154744 |
| 3.477981 | 2 | 29.69919 | 1 | 13.30157 | 2 | 12.33083 | 1 | 5.577004 |
| 4.905659 | 2 | 24.0404  | 2 | 6.279244 | 1 | 7.811827 | 2 | 1.99973  |
| 3.545296 | 2 | 21.93292 | 2 | 7.120852 | 1 | 8.142666 | 2 | 5.123773 |
| 3.979264 | 2 | 23.46066 | 2 | 5.497956 | 1 | 3.776705 | 2 | 0.693208 |
| 3.017703 | 2 | 29.07763 | 1 | 3.578538 | 1 | 3.32656  | 2 | 1.088067 |
| 3.219041 | 2 | 35.0861  | 1 | 12.2626  | 2 | 13.51073 | 1 | 2.481526 |
| 5.018942 | 1 | 19.16547 | 2 | 7.951966 | 1 | 7.950402 | 2 | 3.965734 |
| 3.947963 | 2 | 27.78569 | 1 | 4.834056 | 1 | 4.987365 | 2 | 4.351358 |
| 3.927537 | 2 | 20.45414 | 2 | 8.055733 | 1 | 7.765709 | 2 | 2.61694  |
| 4.075711 | 2 | 18.75316 | 2 | 7.817097 | 1 | 7.811196 | 2 | 4.837497 |
| 3.760215 | 2 | 36.97089 | 1 | 11.6268  | 2 | 13.76565 | 1 | 4.329544 |
| 3.370865 | 2 | 18.06194 | 2 | 10.23445 | 2 | 8.353942 | 2 | 4.510405 |
| 2.761581 | 2 | 49.8165  | 1 | 10.4207  | 2 | 11.6341  | 1 | 8.630437 |
| 2.488095 | 2 | 24.70567 | 2 | 10.70782 | 2 | 11.67099 | 1 | 2.886814 |

| Class_antik | Antilog_FIE | Class_antik | Antilog_CO | Class_antik | Antilog_vit | Class_antik | Antilog_vit | Class_antik |
|-------------|-------------|-------------|------------|-------------|-------------|-------------|-------------|-------------|
| 2           | 11.99883    | 2           | 1.572436   | 1           | 0.980154    | 2           | 1.431117    | 1           |
| 2           | 5.790523    | 2           | 167.7952   | 1           | 0.574217    | 2           | 0.963044    | 2           |
| 2           | 11.32919    | 2           | 286.9047   | 1           | 0.59927     | 2           | 1.69117     | 1           |
| 2           | 5.706863    | 2           | 12.68623   | 1           | 0.738217    | 2           | 2.068948    | 1           |
| 2           | 5.706863    | 2           | 586.3756   | 2           | 0.7929      | 2           | 0.863561    | 2           |
| 2           | 7.887659    | 2           | 377.9077   | 2           | 0.220291    | 2           | 0.48754     | 2           |
| 2           | 6.30022     | 2           | 167.5392   | 1           | 1.112027    | 1           | 0.654059    | 2           |
| 2           | 4.427289    | 2           | 50.94897   | 1           | 0.19803     | 2           | 0.314854    | 2           |
| 2           | 7.913392    | 2           | 110.5144   | 1           | 1.003776    | 1           | 1.22805     | 1           |
| 2           | 8.721999    | 2           | 122.3169   | 1           | 1.349581    | 1           | 1.039949    | 2           |
| 2           | 7.377135    | 2           | 230.8502   | 1           | 0.651206    | 2           | 0.997624    | 2           |
| 2           | 14.19352    | 2           | 543.3449   | 2           | 1.110389    | 1           | 2.188489    | 1           |
| 2           | 6.176803    | 2           | 321.9111   | 2           | 0.7395      | 2           | 0.810851    | 2           |
| 2           | 7.376242    | 2           | 955.6326   | 2           | 2.689318    | 1           | 3.534853    | 1           |
| 2           | 11.26127    | 2           | 297.4323   | 1           | 1.11391     | 1           | 1.702728    | 1           |
| 2           | 11.34648    | 2           | 546.8501   | 2           | 1.117185    | 1           | 4.189278    | 1           |
| 2           | 11.64145    | 2           | 136.0478   | 1           | 0.766652    | 2           | 0.520775    | 2           |
| 2           | 26.432      | 1           | 331.8989   | 2           | 1.094439    | 1           | 1.573987    | 1           |
| 2           | 3.622777    | 2           | 305.1053   | 2           | 0.891481    | 2           | 0.455035    | 2           |
| 2           | 6.30022     | 2           | 101.7247   | 1           | 0.671781    | 2           | 0.628337    | 2           |
| 2           | 4.509853    | 2           | 293.6188   | 1           | 0.906763    | 2           | 2.314012    | 1           |
| 2           | 8.660008    | 2           | 416.3372   | 2           | 1.234817    | 1           | 2.741693    | 1           |
| 2           | 9.636214    | 2           | 326.655    | 2           | 1.739271    | 1           | 2.367696    | 1           |
| 1           | 4.043381    | 2           | 343.7054   | 2           | 0.857488    | 2           | 1.054274    | 2           |
| 2           | 12.50646    | 2           | 432.4432   | 2           | 1.03746     | 1           | 2.587218    | 1           |
| 1           | 14.0681     | 2           | 381.914    | 2           | 0.638522    | 2           | 0.631244    | 2           |
| 2           | 8.075633    | 2           | 207.0327   | 1           | 0.587825    | 2           | 0.448549    | 2           |
| 2           | 13.89157    | 2           | 486.0197   | 2           | 1.456275    | 1           | 2.600726    | 1           |
| 2           | 23.69928    | 1           | 439.7573   | 2           | 1.555706    | 1           | 1.768528    | 1           |
| 2           | 21.36879    | 2           | 475.3562   | 2           | 1.651169    | 1           | 2.540799    | 1           |
| 2           | 6.740238    | 2           | 221.5879   | 1           | 0.801262    | 2           | 1.636883    | 1           |
| 2           | 7.376242    | 2           | 288.2429   | 1           | 0.896439    | 2           | 1.508204    | 1           |
| 2           | 3.622777    | 2           | 590.9334   | 2           | 1.049748    | 1           | 0.886432    | 2           |
| 2           | 11.61775    | 2           | 696.3305   | 2           | 0.678242    | 2           | 0.922429    | 2           |
| 1           | 3.600468    | 2           | 1626.083   | 2           | 1.474097    | 1           | 2.179571    | 1           |
| 2           | 8.475335    | 2           | 218.0685   | 1           | 0.967595    | 2           | 0.58206     | 2           |
| 2           | 14.86533    | 2           | 385.8761   | 2           | 1.004912    | 1           | 2.342406    | 1           |
| 2           | 5.540188    | 2           | 859.7545   | 2           | 1.39034     | 1           | 5.825832    | 1           |
| 2           | 6.813991    | 2           | 379.3927   | 2           | 1.269103    | 1           | 1.782521    | 1           |
| 2           | 7.887659    | 2           | 193.1282   | 1           | 1.242198    | 1           | 0.835783    | 2           |
| 2           | 5.43275     | 2           | 246.2947   | 1           | 1.844884    | 1           | 1.466071    | 1           |
| 2           | 9.582567    | 2           | 175.0322   | 1           | 0.920261    | 2           | 1.306644    | 1           |
| 2           | 9.595442    | 2           | 91.49778   | 1           | 1.350207    | 1           | 1.170743    | 1           |
| 2           | 11.43484    | 2           | 198.3917   | 1           | 1.418151    | 1           | 0.832045    | 2           |
| 2           | 2.979339    | 2           | 263.7062   | 1           | 0.728002    | 2           | 1.19877     | 1           |
| 2           | 9.384359    | 2           | 374.1748   | 2           | 1.03015     | 1           | 1.165194    | 1           |

|   |          |   |          |   |          |   |          |   |
|---|----------|---|----------|---|----------|---|----------|---|
| 2 | 7.967519 | 2 | 74.37053 | 1 | 0.556696 | 2 | 1.897584 | 1 |
| 1 | 8.144694 | 2 | 437.0579 | 2 | 1.279388 | 1 | 1.42245  | 1 |
| 2 | 18.43762 | 2 | 323.0874 | 2 | 1.141843 | 1 | 1.558428 | 1 |
| 2 | 17.96896 | 2 | 297.2184 | 1 | 1.437323 | 1 | 1.543094 | 1 |
| 1 | 12.70393 | 2 | 325.8167 | 2 | 1.051138 | 1 | 1.145709 | 1 |
| 2 | 11.61775 | 2 | 173.6208 | 1 | 0.825207 | 2 | 0.899554 | 2 |
| 2 | 12.25957 | 2 | 124.1324 | 1 | 1.395695 | 1 | 0.863286 | 2 |
| 2 | 19.38983 | 2 | 223.1548 | 1 | 1.233532 | 1 | 0.875306 | 2 |
| 2 | 9.75701  | 2 | 146.7804 | 1 | 1.290577 | 1 | 0.806555 | 2 |
| 2 | 4.427289 | 2 | 94.97011 | 1 | 0.929463 | 2 | 0.485775 | 2 |
| 2 | 7.377135 | 2 | 768.7302 | 2 | 1.258634 | 1 | 1.285826 | 1 |
| 2 | 13.04406 | 2 | 329.4324 | 2 | 0.886498 | 2 | 0.929696 | 2 |
| 2 | 21.1128  | 2 | 510.3892 | 2 | 1.178457 | 1 | 1.865668 | 1 |
| 2 | 15.51112 | 2 | 362.6453 | 2 | 1.915825 | 1 | 1.727743 | 1 |
| 2 | 6.740238 | 2 | 312.1268 | 2 | 1.036371 | 1 | 0.687355 | 2 |
| 2 | 23.19453 | 1 | 307.3074 | 2 | 1.195773 | 1 | 1.842605 | 1 |
| 2 | 5.566751 | 2 | 167.7668 | 1 | 0.765648 | 2 | 0.818913 | 2 |
| 2 | 3.600468 | 2 | 233.0456 | 1 | 0.82023  | 2 | 1.189701 | 1 |
| 2 | 12.14366 | 2 | 309.6474 | 2 | 1.005272 | 1 | 1.488726 | 1 |
| 2 | 17.50536 | 2 | 392.0724 | 2 | 1.299717 | 1 | 2.181906 | 1 |
| 2 | 11.70594 | 2 | 183.5686 | 1 | 0.861985 | 2 | 1.159464 | 1 |
| 2 | 15.42133 | 2 | 1044.301 | 2 | 1.242806 | 1 | 1.817495 | 1 |
| 2 | 20.97937 | 2 | 280.4234 | 1 | 1.043494 | 1 | 1.211374 | 1 |
| 2 | 21.88774 | 1 | 609.3935 | 2 | 1.038306 | 1 | 1.38816  | 1 |
| 2 | 18.07953 | 2 | 284.649  | 1 | 1.274956 | 1 | 1.635141 | 1 |
| 1 | 39.50641 | 1 | 548.0178 | 2 | 0.770722 | 2 | 1.232123 | 1 |
| 2 | 14.9914  | 2 | 512.4096 | 2 | 1.903565 | 1 | 1.618294 | 1 |

| Antilog_vit | Class_antik | Antilog_vit | Class_antik | Antilog_vit | Class_antik | Antilog_vit | Class_antik |
|-------------|-------------|-------------|-------------|-------------|-------------|-------------|-------------|
| 8.719602    | 2           | 0.455122    | 2           | 4.497616    | 1           | 38.76894    | 2           |
| 45.91944    | 1           | 0.18602     | 2           | 1.52956     | 2           | 41.54406    | 2           |
| 44.2759     | 1           | 1.207657    | 1           | 9.951116    | 1           | 36.04144    | 2           |
| 3.116502    | 2           | 0.851387    | 2           | 3.966418    | 1           | 0.874594    | 2           |
| 3.116502    | 2           | 0.188709    | 2           | 1.499186    | 2           | 7.958809    | 2           |
| 55.57457    | 1           | 0.420584    | 2           | 1.744929    | 2           | 8.252705    | 2           |
| 21.35859    | 1           | 0.451582    | 2           | 0.637578    | 2           | 8.1033      | 2           |
| 20.06367    | 1           | 0.167783    | 2           | 1.769443    | 2           | 0.523551    | 2           |
| 14.46642    | 1           | 0.245997    | 2           | 3.057446    | 1           | 19.24733    | 2           |
| 28.86405    | 1           | 0.452691    | 2           | 2.291809    | 1           | 4.338284    | 2           |
| 14.97968    | 1           | 0.556283    | 2           | 6.154829    | 1           | 7.063139    | 2           |
| 45.3146     | 1           | 1.711524    | 1           | 3.220012    | 1           | 58.31318    | 2           |
| 70.60901    | 1           | 0.558604    | 2           | 6.251288    | 1           | 63.04421    | 1           |
| 60.30717    | 1           | 1.965674    | 1           | 5.849898    | 1           | 139.8795    | 1           |
| 37.9913     | 1           | 1.054115    | 2           | 2.112793    | 1           | 552.3447    | 1           |
| 82.82957    | 1           | 1.988037    | 1           | 96.17686    | 1           | 64.75834    | 1           |
| 31.9363     | 1           | 0.702535    | 2           | 1.164388    | 2           | 19.85735    | 2           |
| 60.95537    | 1           | 1.657444    | 1           | 4.823715    | 1           | 32.5805     | 2           |
| 55.88877    | 1           | 0.196582    | 2           | 2.572371    | 1           | 23.16695    | 2           |
| 21.35859    | 1           | 0.345528    | 2           | 0.83204     | 2           | 14.59267    | 2           |
| 41.16733    | 1           | 0.796058    | 2           | 32.25872    | 1           | 13.77937    | 2           |
| 65.63918    | 1           | 1.456391    | 1           | 48.54356    | 1           | 49.56045    | 2           |
| 53.33022    | 1           | 1.057104    | 2           | 38.13013    | 1           | 40.62505    | 2           |
| 40.1148     | 1           | 1.02496     | 2           | 4.022547    | 1           | 28.3641     | 2           |
| 84.02295    | 1           | 1.57991     | 1           | 56.24837    | 1           | 33.33961    | 2           |
| 57.39942    | 1           | 0.962924    | 2           | 1.481068    | 2           | 5.956755    | 2           |
| 44.41004    | 1           | 0.867283    | 2           | 2.257242    | 1           | 32.62297    | 2           |
| 45.16985    | 1           | 2.417365    | 1           | 10.93711    | 1           | 26.40751    | 2           |
| 57.24997    | 1           | 1.190734    | 1           | 4.706403    | 1           | 79.16708    | 1           |
| 69.90554    | 1           | 1.458692    | 1           | 21.29827    | 1           | 42.1795     | 2           |
| 30.48035    | 1           | 0.761959    | 2           | 2.37848     | 1           | 1.471001    | 2           |
| 60.30717    | 1           | 0.569912    | 2           | 7.939695    | 1           | 2.834198    | 2           |
| 55.88877    | 1           | 0.335786    | 2           | 2.042578    | 1           | 21.25182    | 2           |
| 26.67558    | 1           | 0.201094    | 2           | 1.763018    | 2           | 9.70236     | 2           |
| 25.54261    | 1           | 0.458332    | 2           | 5.795778    | 1           | 14.75277    | 2           |
| 45.89703    | 1           | 0.70803     | 2           | 2.051821    | 1           | 38.46594    | 2           |
| 86.78397    | 1           | 0.981249    | 2           | 42.52033    | 1           | 30.79518    | 2           |
| 124.4852    | 1           | 2.912811    | 1           | 134.3061    | 1           | 50.28216    | 2           |
| 127.9738    | 1           | 2.145923    | 1           | 29.62892    | 1           | 51.56781    | 2           |
| 55.57457    | 1           | 0.204284    | 2           | 3.257831    | 1           | 2.415438    | 2           |
| 57.09605    | 1           | 1.496269    | 1           | 3.529123    | 1           | 123.5771    | 1           |
| 30.56173    | 1           | 0.445368    | 2           | 1.896644    | 2           | 52.04041    | 2           |
| 23.423      | 1           | 0.553481    | 2           | 0.908724    | 2           | 4.786269    | 2           |
| 51.07549    | 1           | 0.697111    | 2           | 1.637033    | 2           | 28.08751    | 2           |
| 50.99119    | 1           | 0.832932    | 2           | 19.54972    | 1           | 18.66564    | 2           |
| 102.4046    | 1           | 1.451593    | 1           | 2.684156    | 1           | 16.51117    | 2           |

|          |   |          |   |          |   |          |   |          |
|----------|---|----------|---|----------|---|----------|---|----------|
| 11.91013 | 2 | 0.539528 | 2 | 6.848986 | 1 | 3.957707 | 2 | 4.78002  |
| 62.84448 | 1 | 1.26099  | 1 | 4.761586 | 1 | 31.20287 | 2 | 18.02244 |
| 50.70482 | 1 | 1.440963 | 1 | 1.617877 | 2 | 25.44014 | 2 | 3.374292 |
| 62.64134 | 1 | 1.614693 | 1 | 4.88473  | 1 | 74.96361 | 1 | 2.269488 |
| 79.11571 | 1 | 1.577417 | 1 | 4.98379  | 1 | 141.6842 | 1 | 4.210049 |
| 26.67558 | 1 | 0.37607  | 2 | 2.73228  | 1 | 80.53781 | 1 | 2.320443 |
| 34.21101 | 1 | 0.917204 | 2 | 3.759888 | 1 | 48.58589 | 2 | 7.569907 |
| 55.90609 | 1 | 0.994315 | 2 | 2.794179 | 1 | 28.72091 | 2 | 12.63971 |
| 59.32668 | 1 | 1.397174 | 1 | 2.508588 | 1 | 53.19166 | 2 | 10.48718 |
| 20.06367 | 1 | 0.151803 | 2 | 0.760363 | 2 | 50.31323 | 2 | 1.160348 |
| 14.97968 | 1 | 0.650851 | 2 | 1.87144  | 2 | 57.75825 | 2 | 1.857187 |
| 46.41198 | 1 | 1.252322 | 1 | 3.347873 | 1 | 160.6525 | 1 | 3.802282 |
| 65.898   | 1 | 1.933355 | 1 | 6.571144 | 1 | 248.4736 | 1 | 5.978911 |
| 66.89591 | 1 | 1.230391 | 1 | 2.02051  | 1 | 59.53598 | 2 | 3.004864 |
| 30.48035 | 1 | 0.28639  | 2 | 1.561365 | 2 | 46.18945 | 2 | 1.342612 |
| 56.77722 | 1 | 1.896737 | 1 | 4.238171 | 1 | 4338.221 | 1 | 3.731835 |
| 27.67725 | 1 | 0.244529 | 2 | 4.90916  | 1 | 122.4358 | 1 | 1.676181 |
| 25.54261 | 1 | 0.665067 | 2 | 9.795127 | 1 | 2.30512  | 2 | 2.64348  |
| 76.57987 | 1 | 1.81268  | 1 | 9.239329 | 1 | 12.70977 | 2 | 7.509056 |
| 33.93426 | 1 | 1.636165 | 1 | 2.396207 | 1 | 78.42778 | 1 | 3.412129 |
| 50.36159 | 1 | 0.509389 | 2 | 2.504816 | 1 | 8.969463 | 2 | 2.338175 |
| 53.22614 | 1 | 0.969555 | 2 | 42.48298 | 1 | 51.57796 | 2 | 5.135461 |
| 59.49761 | 1 | 1.439439 | 1 | 6.161118 | 1 | 82.28014 | 1 | 4.153959 |
| 62.47081 | 1 | 1.522136 | 1 | 10.79225 | 1 | 136.2519 | 1 | 6.953892 |
| 53.16558 | 1 | 1.750714 | 1 | 6.831163 | 1 | 139.9098 | 1 | 6.608965 |
| 74.28713 | 1 | 2.902341 | 1 | 8.044813 | 1 | 153.466  | 1 | 5.853634 |
| 98.41136 | 1 | 1.583443 | 1 | 5.281133 | 1 | 101.466  | 1 | 3.046645 |



| Class_antik | Antilog_FO | Class_antik | Antilog_CA | Class_antik | Antilog_FO | Class_antik | Antilog_FEI | Class_antik |
|-------------|------------|-------------|------------|-------------|------------|-------------|-------------|-------------|
| 2           | 92.52639   | 2           | 264.0631   | 2           | 756.2694   | 2           | 12.26867    | 1           |
| 2           | 6.104626   | 2           | 284.3899   | 2           | 818.4717   | 2           | 8.320488    | 1           |
| 2           | 110.705    | 2           | 257.4096   | 2           | 880.5041   | 2           | 9.572043    | 1           |
| 2           | 127.1951   | 2           | 379.7262   | 2           | 854.5041   | 2           | 7.437614    | 2           |
| 2           | 30.36837   | 2           | 372.7748   | 2           | 1612.319   | 1           | 18.02915    | 1           |
| 2           | 20.26608   | 2           | 91.94454   | 2           | 684.705    | 2           | 6.277997    | 2           |
| 2           | 2.989787   | 2           | 159.2236   | 2           | 808.967    | 2           | 8.334588    | 1           |
| 2           | 11.36875   | 2           | 93.5436    | 2           | 384.4838   | 2           | 7.136802    | 2           |
| 2           | 31.41427   | 2           | 412.0609   | 2           | 1066.76    | 1           | 12.27593    | 1           |
| 2           | 24.95281   | 2           | 270.5633   | 2           | 896.3759   | 2           | 11.79758    | 1           |
| 2           | 25.18933   | 2           | 181.7974   | 2           | 1100.902   | 1           | 11.82371    | 1           |
| 2           | 160.0858   | 2           | 494.7736   | 2           | 1163.341   | 1           | 12.35829    | 1           |
| 2           | 26.14425   | 2           | 325.4683   | 2           | 1114.431   | 1           | 11.15649    | 1           |
| 2           | 224.9355   | 2           | 1197.686   | 1           | 2409.529   | 1           | 19.23011    | 1           |
| 2           | 161.5018   | 2           | 532.7129   | 2           | 1107.139   | 1           | 12.58283    | 1           |
| 2           | 233.0525   | 2           | 260.8608   | 2           | 1046.143   | 2           | 15.43251    | 1           |
| 2           | 30.87243   | 2           | 235.9813   | 2           | 845.0786   | 2           | 12.52398    | 1           |
| 2           | 183.8367   | 2           | 182.2805   | 2           | 863.6323   | 2           | 10.87978    | 1           |
| 2           | 5.381544   | 2           | 152.4448   | 2           | 1220.211   | 1           | 6.929329    | 2           |
| 2           | 10.07336   | 2           | 138.2933   | 2           | 764.1387   | 2           | 8.180789    | 1           |
| 2           | 90.33839   | 2           | 243.5362   | 2           | 1187.459   | 1           | 14.63148    | 1           |
| 1           | 151.4855   | 2           | 230.4206   | 2           | 1113.291   | 1           | 15.61232    | 1           |
| 1           | 128.8789   | 2           | 339.6195   | 2           | 1129.248   | 1           | 22.22296    | 1           |
| 1           | 52.00067   | 2           | 282.0228   | 2           | 939.4838   | 2           | 11.02996    | 1           |
| 2           | 143.248    | 2           | 218.1443   | 2           | 991.3247   | 2           | 13.65318    | 1           |
| 1           | 38.43393   | 2           | 143.0221   | 2           | 1022.403   | 2           | 12.34985    | 1           |
| 2           | 37.04542   | 2           | 224.8265   | 2           | 511.5442   | 2           | 6.930846    | 2           |
| 2           | 157.6279   | 2           | 386.1252   | 2           | 1635.579   | 1           | 8.602986    | 1           |
| 2           | 175.5246   | 2           | 345.9067   | 2           | 1105.717   | 1           | 10.44772    | 1           |
| 2           | 299.4166   | 2           | 498.3792   | 2           | 1527.994   | 1           | 13.36343    | 1           |
| 2           | 82.88437   | 2           | 154.9566   | 2           | 1077.892   | 1           | 13.32486    | 1           |
| 2           | 75.54148   | 2           | 197.1828   | 2           | 1080.169   | 1           | 14.27164    | 1           |
| 2           | 30.65853   | 2           | 501.4154   | 2           | 1760.172   | 1           | 14.152      | 1           |
| 2           | 46.59075   | 2           | 246.9456   | 2           | 1313.966   | 1           | 15.35275    | 1           |
| 2           | 123.5673   | 2           | 427.6338   | 2           | 2153.381   | 1           | 23.44651    | 1           |
| 2           | 38.82722   | 2           | 153.1798   | 2           | 831.1941   | 2           | 11.59751    | 1           |
| 2           | 119.835    | 2           | 511.4052   | 2           | 1182.873   | 1           | 12.00858    | 1           |
| 1           | 304.2139   | 2           | 259.174    | 2           | 1560.138   | 1           | 20.78884    | 1           |
| 2           | 106.1637   | 2           | 161.6994   | 2           | 1135.638   | 1           | 14.21862    | 1           |
| 2           | 10.85115   | 2           | 183.6727   | 2           | 1112.502   | 1           | 15.64047    | 1           |
| 2           | 47.68317   | 2           | 705.196    | 2           | 1165.457   | 1           | 19.78237    | 1           |
| 2           | 54.79459   | 2           | 339.8182   | 2           | 1031.751   | 2           | 13.57161    | 1           |
| 2           | 4.620549   | 2           | 203.8932   | 2           | 952.8452   | 2           | 9.103849    | 1           |
| 2           | 68.10686   | 2           | 292.069    | 2           | 901.7673   | 2           | 14.27743    | 1           |
| 2           | 55.40449   | 2           | 185.3054   | 2           | 752.1011   | 2           | 9.859146    | 1           |
| 2           | 58.05705   | 2           | 460.3023   | 2           | 1277.249   | 1           | 10.83538    | 1           |

|   |          |   |          |   |          |   |          |   |
|---|----------|---|----------|---|----------|---|----------|---|
| 2 | 122.566  | 2 | 307.6848 | 2 | 969.1836 | 2 | 9.776105 | 1 |
| 1 | 93.03928 | 2 | 361.8451 | 2 | 1129.656 | 1 | 16.73042 | 1 |
| 2 | 134.0982 | 2 | 253.2516 | 2 | 748.6837 | 2 | 9.725683 | 1 |
| 2 | 48.19597 | 2 | 728.9143 | 2 | 1320.589 | 1 | 11.88008 | 1 |
| 2 | 318.2759 | 2 | 192.7879 | 2 | 844.1641 | 2 | 12.0399  | 1 |
| 2 | 45.0276  | 2 | 208.4611 | 2 | 1120.208 | 1 | 10.62176 | 1 |
| 2 | 61.50658 | 2 | 371.8149 | 2 | 499.624  | 2 | 8.398802 | 1 |
| 1 | 59.43544 | 2 | 472.1484 | 2 | 952.1164 | 2 | 12.24158 | 1 |
| 2 | 117.5428 | 2 | 202.819  | 2 | 612.612  | 2 | 13.81795 | 1 |
| 2 | 13.44806 | 2 | 194.8029 | 2 | 886.7671 | 2 | 9.154537 | 1 |
| 2 | 39.51046 | 2 | 1056.754 | 2 | 2506.159 | 1 | 16.93145 | 1 |
| 2 | 118.8719 | 2 | 193.9322 | 2 | 884.9716 | 2 | 9.668872 | 1 |
| 2 | 291.3844 | 2 | 252.5906 | 2 | 868.2709 | 2 | 11.85322 | 1 |
| 2 | 147.6041 | 2 | 448.2513 | 2 | 1152.8   | 1 | 9.148924 | 1 |
| 2 | 4.04314  | 2 | 229.4798 | 2 | 1076.494 | 1 | 15.14905 | 1 |
| 2 | 177.6479 | 2 | 211.6745 | 2 | 855.3411 | 2 | 10.99814 | 1 |
| 2 | 12.91453 | 2 | 260.0509 | 2 | 936.4892 | 2 | 10.91056 | 1 |
| 2 | 46.61454 | 2 | 175.6682 | 2 | 838.0392 | 2 | 11.14073 | 1 |
| 2 | 80.56376 | 2 | 165.6068 | 2 | 1039.031 | 2 | 15.04197 | 1 |
| 2 | 144.0755 | 2 | 223.9886 | 2 | 816.7679 | 2 | 6.846734 | 2 |
| 2 | 39.3332  | 2 | 299.8426 | 2 | 1026.085 | 2 | 9.397063 | 1 |
| 2 | 112.3166 | 2 | 182.2566 | 2 | 774.2912 | 2 | 13.31347 | 1 |
| 2 | 152.7775 | 2 | 308.6047 | 2 | 1187.505 | 1 | 9.318574 | 1 |
| 2 | 312.4735 | 2 | 202.5038 | 2 | 1020.043 | 2 | 13.77229 | 1 |
| 2 | 201.1423 | 2 | 868.6216 | 2 | 1666.318 | 1 | 14.57719 | 1 |
| 2 | 138.9476 | 2 | 184.9046 | 2 | 916.6024 | 2 | 7.428074 | 2 |
| 2 | 94.35495 | 2 | 151.8494 | 2 | 1336.374 | 1 | 11.93407 | 1 |

| Antilog_ZIN | Class_antil | Antilog_SÓ | Class_antil | Antilog_M/ | Class_antil | Antilog_Ce | Class_cere | Antilog_Fru |
|-------------|-------------|------------|-------------|------------|-------------|------------|------------|-------------|
| 1.649929    | 2           | 366.6994   | 1           | 143.5117   | 2           | 4.435088   | 2          | 4.968214    |
| 3.344368    | 2           | 327.9055   | 1           | 45.70137   | 2           | 6.417718   | 1          | 2.325938    |
| 7.290791    | 2           | 1571.277   | 2           | 94.98582   | 2           | 3.033961   | 2          | 2.267895    |
| 4.557259    | 2           | 557.3674   | 1           | 88.28888   | 2           | 1.406393   | 2          | 0.98799     |
| 22.45399    | 1           | 498.9464   | 1           | 111.255    | 2           | 5.911958   | 2          | 2.588535    |
| 9.754243    | 1           | 851.2618   | 1           | 81.55793   | 2           | 5.117857   | 2          | 2.532738    |
| 7.251451    | 2           | 1163.156   | 1           | 61.6182    | 2           | 4.365486   | 2          | 1.448186    |
| 3.502424    | 2           | 86.14601   | 1           | 18.24295   | 2           | 3.867302   | 2          | 1.311213    |
| 6.778986    | 2           | 598.3107   | 1           | 92.00051   | 2           | 3.263564   | 2          | 1.461474    |
| 4.008617    | 2           | 767.4901   | 1           | 55.26347   | 2           | 8.684707   | 1          | 4.889465    |
| 8.203844    | 2           | 950.6967   | 1           | 103.4293   | 2           | 5.404295   | 2          | 1.315369    |
| 11.57629    | 1           | 1037.518   | 1           | 231.2269   | 2           | 4.270115   | 2          | 4.882182    |
| 6.316089    | 2           | 1413.65    | 1           | 129.3869   | 2           | 4.787305   | 2          | 2.605503    |
| 21.50482    | 1           | 3889.938   | 2           | 275.8157   | 2           | 8.163074   | 1          | 4.65385     |
| 11.18132    | 1           | 1394.344   | 1           | 199.3437   | 2           | 5.18794    | 2          | 5.027346    |
| 9.766202    | 1           | 1640.699   | 2           | 178.6705   | 2           | 2.477963   | 2          | 4.088522    |
| 7.324883    | 2           | 1331.274   | 1           | 183.4634   | 2           | 3.555594   | 2          | 4.599037    |
| 10.23364    | 1           | 2498.601   | 2           | 201.5223   | 2           | 8.981915   | 1          | 1.011819    |
| 4.667106    | 2           | 254.75     | 1           | 80.86056   | 2           | 6.189116   | 1          | 2.53795     |
| 3.181479    | 2           | 857.5724   | 1           | 72.93216   | 2           | 16.29604   | 1          | 2.72259     |
| 7.617571    | 2           | 582.8753   | 1           | 72.90685   | 2           | 4.121705   | 2          | 0.889437    |
| 8.577197    | 1           | 1524.278   | 2           | 125.1376   | 2           | 4.19091    | 2          | 3.564745    |
| 6.904004    | 2           | 1637.057   | 2           | 130.8869   | 2           | 1.887542   | 2          | 2.225145    |
| 9.431655    | 1           | 1540.988   | 2           | 119.3013   | 2           | 1.436133   | 2          | 2.696901    |
| 8.089083    | 2           | 2120.903   | 2           | 179.7291   | 2           | 6.697758   | 1          | 2.987961    |
| 9.616271    | 1           | 2430.729   | 2           | 163.7995   | 2           | 3.258685   | 2          | 0.977579    |
| 5.140642    | 2           | 1934.336   | 2           | 90.35553   | 2           | 2.048255   | 2          | 5.375122    |
| 8.822823    | 1           | 2062.625   | 2           | 342.504    | 1           | 6.000857   | 1          | 1.703426    |
| 12.40626    | 1           | 2625.071   | 2           | 214.5268   | 2           | 5.447019   | 2          | 3.022555    |
| 11.94643    | 1           | 2426.993   | 2           | 232.3782   | 2           | 6.178392   | 1          | 1.677884    |
| 9.444588    | 1           | 695.6231   | 1           | 72.85902   | 2           | 5.517248   | 2          | 1.035413    |
| 8.235906    | 2           | 437.8778   | 1           | 64.70465   | 2           | 4.887119   | 2          | 1.052907    |
| 15.19523    | 1           | 955.1561   | 1           | 77.64908   | 2           | 6.861027   | 1          | 2.007936    |
| 18.07646    | 1           | 259.9599   | 1           | 84.26781   | 2           | 4.284876   | 2          | 1.797986    |
| 24.78146    | 1           | 1271.254   | 1           | 185.8034   | 2           | 6.731087   | 1          | 1.42324     |
| 8.345208    | 2           | 1600.799   | 2           | 175.4886   | 2           | 3.165626   | 2          | 3.34799     |
| 7.76874     | 2           | 1780.438   | 2           | 192.0223   | 2           | 4.591697   | 2          | 2.96842     |
| 13.45702    | 1           | 2513.15    | 2           | 131.1209   | 2           | 3.904535   | 2          | 2.692805    |
| 6.56224     | 2           | 2131.896   | 2           | 145.6958   | 2           | 2.7239     | 2          | 2.657857    |
| 5.020548    | 2           | 126.6705   | 1           | 34.35603   | 2           | 6.896922   | 1          | 1.068022    |
| 8.401443    | 2           | 1466.342   | 1           | 70.50584   | 2           | 3.037407   | 2          | 1.999331    |
| 5.00323     | 2           | 605.2163   | 1           | 78.09317   | 2           | 20.49905   | 1          | 1.222751    |
| 3.244143    | 2           | 516.2118   | 1           | 119.4549   | 2           | 4.787981   | 2          | 1.875924    |
| 5.365769    | 2           | 1392.729   | 1           | 136.3672   | 2           | 5.372481   | 2          | 3.089318    |
| 3.898027    | 2           | 1046.471   | 1           | 71.86241   | 2           | 4.391737   | 2          | 3.172809    |
| 6.269637    | 2           | 1261.444   | 1           | 203.605    | 2           | 2.905377   | 2          | 0.979266    |

|          |   |          |   |          |   |          |   |          |
|----------|---|----------|---|----------|---|----------|---|----------|
| 5.316493 | 2 | 682.3352 | 1 | 77.91471 | 2 | 5.354866 | 2 | 1.53738  |
| 15.37057 | 1 | 1296.052 | 1 | 131.4451 | 2 | 5.681558 | 2 | 2.597852 |
| 7.292396 | 2 | 2552.536 | 2 | 204.5161 | 2 | 4.972911 | 2 | 2.092839 |
| 17.30758 | 1 | 1216.472 | 1 | 152.6001 | 2 | 4.224427 | 2 | 2.298266 |
| 12.05736 | 1 | 803.525  | 1 | 231.9089 | 2 | 4.775064 | 2 | 3.356083 |
| 6.720735 | 2 | 495.1702 | 1 | 134.5936 | 2 | 6.141028 | 1 | 3.949673 |
| 6.69209  | 2 | 1885.008 | 2 | 158.5657 | 2 | 2.467211 | 2 | 5.368395 |
| 5.956979 | 2 | 2115.559 | 2 | 236.991  | 2 | 5.705833 | 2 | 3.131991 |
| 5.562822 | 2 | 1937.93  | 2 | 159.0926 | 2 | 3.690478 | 2 | 2.248293 |
| 3.580256 | 2 | 649.2243 | 1 | 61.56585 | 2 | 7.92008  | 1 | 2.688459 |
| 16.54789 | 1 | 1327.739 | 1 | 253.6131 | 2 | 7.930809 | 1 | 5.959632 |
| 9.971709 | 1 | 1259.475 | 1 | 235.6299 | 2 | 6.799801 | 1 | 4.064302 |
| 11.37508 | 1 | 1525.245 | 2 | 227.9624 | 2 | 5.646912 | 2 | 3.521194 |
| 8.78398  | 1 | 2600.9   | 2 | 179.5195 | 2 | 4.373927 | 2 | 3.801871 |
| 12.61863 | 1 | 660.1745 | 1 | 109.9734 | 2 | 6.07862  | 1 | 3.737841 |
| 10.31065 | 1 | 2010.058 | 2 | 248.616  | 2 | 6.21769  | 1 | 5.345368 |
| 4.048652 | 2 | 609.6701 | 1 | 44.55578 | 2 | 5.398354 | 2 | 2.979571 |
| 7.46209  | 2 | 546.6118 | 1 | 68.64531 | 2 | 5.280867 | 2 | 1.12134  |
| 16.46627 | 1 | 2070.785 | 2 | 152.2371 | 2 | 4.146877 | 2 | 2.738882 |
| 5.281531 | 2 | 2889.169 | 2 | 158.0753 | 2 | 6.859665 | 1 | 3.130598 |
| 4.179734 | 2 | 410.1561 | 1 | 118.3754 | 2 | 6.112191 | 1 | 2.184642 |
| 6.786715 | 2 | 2549.652 | 2 | 167.3917 | 2 | 3.783807 | 2 | 4.934099 |
| 8.736949 | 1 | 1670.638 | 2 | 269.5723 | 2 | 5.375238 | 2 | 4.280418 |
| 16.63985 | 1 | 1289.607 | 1 | 244.3344 | 2 | 4.52548  | 2 | 4.481993 |
| 11.91272 | 1 | 1715.348 | 2 | 371.0051 | 1 | 5.460334 | 2 | 3.762396 |
| 6.444114 | 2 | 1040.089 | 1 | 313.338  | 2 | 2.371343 | 2 | 3.786517 |
| 20.45752 | 1 | 833.0763 | 1 | 228.84   | 2 | 3.840801 | 2 | 3.709931 |

| Class_fruta | Antilog_Ho | Class_hort | Antilog_Ca | Class_carn | Antilog_Lei | Class_leite | Antilog_Le | Class_legur |
|-------------|------------|------------|------------|------------|-------------|-------------|------------|-------------|
| 1           | 2.32323    | 2          | 2.673395   | 1          | 1.234442    | 2           | 2.894623   | 1           |
| 2           | 1.755156   | 2          | 2.17911    | 1          | 2.147813    | 1           | 1.694682   | 2           |
| 2           | 0.910519   | 2          | 4.418583   | 2          | 1.856191    | 2           | 1.906576   | 2           |
| 2           | 2.720796   | 2          | 4.242275   | 2          | 1.990759    | 2           | 1.704902   | 2           |
| 2           | 1.013962   | 2          | 4.796732   | 2          | 1.939019    | 2           | 4.001757   | 1           |
| 2           | 0.980661   | 2          | 4.330141   | 2          | 1.066716    | 2           | 1.159405   | 2           |
| 2           | 1.634628   | 2          | 4.241583   | 2          | 1.750213    | 2           | 2.66543    | 1           |
| 2           | 1.069253   | 2          | 2.065827   | 1          | 1.172708    | 2           | 1.882727   | 2           |
| 2           | 1.713749   | 2          | 1.335292   | 1          | 2.476114    | 1           | 1.86199    | 2           |
| 1           | 1.297702   | 2          | 2.36938    | 1          | 1.489056    | 2           | 1.839748   | 2           |
| 2           | 0.986604   | 2          | 2.942314   | 1          | 1.259336    | 2           | 3.993783   | 1           |
| 1           | 1.615828   | 2          | 3.351203   | 2          | 1.836672    | 2           | 1.717061   | 2           |
| 2           | 0.966818   | 2          | 3.394149   | 2          | 1.626227    | 2           | 2.529921   | 1           |
| 1           | 3.694813   | 1          | 6.490408   | 2          | 5.423844    | 1           | 2.283843   | 1           |
| 1           | 1.978865   | 2          | 3.166386   | 2          | 1.688666    | 2           | 2.441664   | 1           |
| 1           | 1.830995   | 2          | 3.359128   | 2          | 1.920647    | 2           | 2.412324   | 1           |
| 1           | 1.067899   | 2          | 5.69349    | 2          | 2.631445    | 1           | 6.963206   | 1           |
| 2           | 1.825223   | 2          | 5.487648   | 2          | 1.233809    | 2           | 2.134733   | 1           |
| 2           | 0.97835    | 2          | 3.751761   | 2          | 1.075071    | 2           | 2.407516   | 1           |
| 2           | 1.041165   | 2          | 8.869003   | 2          | 1.675741    | 2           | 0.965736   | 2           |
| 2           | 1.143911   | 2          | 3.893154   | 2          | 2.038522    | 1           | 3.338594   | 1           |
| 1           | 2.29219    | 2          | 5.797669   | 2          | 2.747363    | 1           | 0.968933   | 2           |
| 2           | 1.059455   | 2          | 4.430889   | 2          | 2.83363     | 1           | 0.951309   | 2           |
| 2           | 1.005576   | 2          | 7.437018   | 2          | 1.276313    | 2           | 1.74161    | 2           |
| 1           | 1.677724   | 2          | 3.297476   | 2          | 2.25532     | 1           | 2.290846   | 1           |
| 2           | 1.026364   | 2          | 5.71709    | 2          | 0.91754     | 2           | 3.177721   | 1           |
| 1           | 0.981849   | 2          | 2.342442   | 1          | 1.062453    | 2           | 2.17415    | 1           |
| 2           | 1.00443    | 2          | 3.605012   | 2          | 1.281135    | 2           | 3.466731   | 1           |
| 2           | 1.014229   | 2          | 4.544676   | 2          | 1.565131    | 2           | 2.815409   | 1           |
| 2           | 1.021996   | 2          | 5.801206   | 2          | 1.563362    | 2           | 3.788092   | 1           |
| 2           | 0.960852   | 2          | 4.366693   | 2          | 1.141189    | 2           | 2.812933   | 1           |
| 2           | 1.51723    | 2          | 4.232848   | 2          | 1.216109    | 2           | 2.903639   | 1           |
| 2           | 0.97835    | 2          | 6.973653   | 2          | 1.838372    | 2           | 3.006338   | 1           |
| 2           | 1.561303   | 2          | 5.038135   | 2          | 1.243835    | 2           | 3.498227   | 1           |
| 2           | 0.917214   | 2          | 7.716906   | 2          | 1.996209    | 1           | 4.234758   | 1           |
| 1           | 3.101484   | 1          | 4.179061   | 2          | 4.006164    | 1           | 3.177521   | 1           |
| 1           | 1.447472   | 2          | 5.621277   | 2          | 2.641744    | 1           | 4.730092   | 1           |
| 2           | 1.007331   | 2          | 4.603386   | 2          | 0.976132    | 2           | 7.959591   | 1           |
| 2           | 1.022545   | 2          | 5.003025   | 2          | 0.92892     | 2           | 4.423928   | 1           |
| 2           | 0.980661   | 2          | 2.540456   | 1          | 1.066716    | 2           | 6.830929   | 1           |
| 2           | 2.255552   | 2          | 3.296385   | 2          | 3.336046    | 1           | 1.062938   | 2           |
| 2           | 1.025615   | 2          | 2.335479   | 1          | 0.919758    | 2           | 2.397906   | 1           |
| 2           | 1.008616   | 2          | 2.298079   | 1          | 0.972028    | 2           | 1.472641   | 2           |
| 1           | 1.022573   | 2          | 6.104973   | 2          | 3.826806    | 1           | 6.199238   | 1           |
| 1           | 1.060701   | 2          | 4.666422   | 2          | 3.637325    | 1           | 2.005223   | 1           |
| 2           | 2.499376   | 2          | 3.821968   | 2          | 2.927704    | 1           | 4.544576   | 1           |

|   |          |   |          |   |          |   |          |   |
|---|----------|---|----------|---|----------|---|----------|---|
| 2 | 0.953579 | 2 | 3.734082 | 2 | 1.712512 | 2 | 1.633758 | 2 |
| 2 | 1.049694 | 2 | 7.190696 | 2 | 0.851809 | 2 | 2.6467   | 1 |
| 2 | 0.998443 | 2 | 3.13669  | 2 | 1.547954 | 2 | 3.775079 | 1 |
| 2 | 1.035899 | 2 | 5.095755 | 2 | 3.381636 | 1 | 2.318245 | 1 |
| 1 | 1.437076 | 2 | 3.19653  | 2 | 1.030053 | 2 | 2.47911  | 1 |
| 1 | 1.020459 | 2 | 3.647797 | 2 | 0.935214 | 2 | 3.7036   | 1 |
| 1 | 0.947087 | 2 | 2.638181 | 1 | 1.196966 | 2 | 3.280577 | 1 |
| 1 | 0.988287 | 2 | 5.049701 | 2 | 3.898998 | 1 | 3.212547 | 1 |
| 2 | 3.534023 | 1 | 5.038561 | 2 | 3.83522  | 1 | 3.40258  | 1 |
| 2 | 1.069253 | 2 | 1.948316 | 1 | 1.083036 | 2 | 2.471451 | 1 |
| 1 | 2.496107 | 2 | 6.252222 | 2 | 2.091225 | 1 | 1.98298  | 2 |
| 1 | 1.027067 | 2 | 3.559109 | 2 | 0.979547 | 2 | 2.1498   | 1 |
| 1 | 1.842556 | 2 | 3.878214 | 2 | 1.068796 | 2 | 2.319991 | 1 |
| 1 | 1.29739  | 2 | 3.139307 | 2 | 2.09706  | 1 | 2.369353 | 1 |
| 1 | 2.411738 | 2 | 4.127634 | 2 | 1.517782 | 2 | 3.136407 | 1 |
| 1 | 0.990266 | 2 | 3.660595 | 2 | 1.032877 | 2 | 2.833856 | 1 |
| 1 | 0.931154 | 2 | 2.234137 | 1 | 2.042392 | 1 | 2.706199 | 1 |
| 2 | 0.917214 | 2 | 3.3422   | 2 | 1.798584 | 2 | 1.766961 | 2 |
| 2 | 0.987908 | 2 | 4.097197 | 2 | 1.041052 | 2 | 4.830523 | 1 |
| 1 | 1.003447 | 2 | 2.09516  | 1 | 1.15676  | 2 | 1.794654 | 2 |
| 2 | 0.960892 | 2 | 3.389446 | 2 | 1.542103 | 2 | 3.355109 | 1 |
| 1 | 0.989751 | 2 | 3.283846 | 2 | 1.034658 | 2 | 3.268978 | 1 |
| 1 | 1.550355 | 2 | 4.597138 | 2 | 1.206114 | 2 | 2.619903 | 1 |
| 1 | 0.968829 | 2 | 4.491654 | 2 | 1.110408 | 2 | 1.849945 | 2 |
| 1 | 5.116621 | 1 | 3.976994 | 2 | 2.661314 | 1 | 2.779203 | 1 |
| 1 | 1.296717 | 2 | 4.236444 | 2 | 1.846808 | 2 | 2.891943 | 1 |
| 1 | 1.015502 | 2 | 6.175894 | 2 | 1.168988 | 2 | 2.447245 | 1 |

| Antilog_Ól | Class_óleo | Antilog_Do | Class_doce | Antilog_vit | VAR00002 | adeq_2gru | ref_final |
|------------|------------|------------|------------|-------------|----------|-----------|-----------|
| 1.510733   | 2          | 2.578793   | 2          | 498.5896    | 2        | 2         | 5         |
| 1.279887   | 2          | 2.271239   | 2          | 123.7693    | 2        | 2         | 4.666667  |
| 1.835476   | 2          | 2.028421   | 2          | 929.8628    | 1        | 2         | 3.333333  |
| 0.914091   | 1          | 2.065108   | 2          | 867.5318    | 1        | 2         | 3         |
| 0.914091   | 1          | 0.936634   | 1          | 217.4535    | 2        | 2         | 3         |
| 1.134872   | 2          | 1.096589   | 2          | 94.94684    | 2        | 2         | 3         |
| 1.801836   | 2          | 1.793672   | 2          | 202.8642    | 2        | 2         | 3         |
| 0.648038   | 1          | 1.292213   | 2          | 34.28636    | 2        | 2         | 2.666667  |
| 4.955972   | 2          | 2.722345   | 2          | 161.0313    | 2        | 2         | 6         |
| 0.88563    | 1          | 1.16489    | 2          | 223.0035    | 2        | 2         | 6         |
| 2.534667   | 2          | 2.666715   | 2          | 104.8065    | 2        | 2         | 5         |
| 1.671135   | 2          | 8.377502   | 2          | 275.3406    | 2        | 2         | 4.666667  |
| 2.887537   | 2          | 1.670188   | 2          | 152.2936    | 2        | 2         | 4.666667  |
| 1.467093   | 2          | 2.869262   | 2          | 1526.977    | 1        | 1         | 4.666667  |
| 2.625361   | 2          | 6.118637   | 2          | 152.015     | 2        | 2         | 4.333333  |
| 3.065615   | 2          | 2.291444   | 2          | 8969.404    | 1        | 2         | 4.333333  |
| 2.515509   | 2          | 1.701315   | 2          | 121.6338    | 2        | 1         | 4.333333  |
| 3.426625   | 2          | 2.738928   | 2          | 851.959     | 1        | 2         | 4         |
| 1.152351   | 2          | 1.518157   | 2          | 293.1037    | 2        | 2         | 4         |
| 1.737385   | 2          | 0.826577   | 1          | 251.4031    | 2        | 2         | 4         |
| 0.782606   | 1          | 0.530035   | 1          | 2679.174    | 1        | 2         | 4         |
| 4.04139    | 2          | 1.338207   | 2          | 4805.945    | 1        | 1         | 4         |
| 2.276827   | 2          | 1.606415   | 2          | 3641.174    | 1        | 2         | 4         |
| 4.186442   | 2          | 1.675433   | 2          | 156.8631    | 2        | 2         | 4         |
| 3.076638   | 2          | 1.497028   | 2          | 5332.883    | 1        | 1         | 4         |
| 3.818758   | 2          | 4.749151   | 2          | 161.7252    | 2        | 2         | 3.666667  |
| 3.817154   | 2          | 1.090338   | 2          | 351.7373    | 2        | 2         | 3.333333  |
| 4.421554   | 2          | 1.204597   | 2          | 187.1305    | 2        | 2         | 3         |
| 1.569548   | 2          | 1.552875   | 2          | 201.6674    | 2        | 2         | 3         |
| 1.806535   | 2          | 0.902374   | 1          | 3002.077    | 1        | 2         | 3         |
| 3.016692   | 2          | 1.207498   | 2          | 401.3931    | 2        | 2         | 3         |
| 1.467093   | 2          | 1.32224    | 2          | 290.3454    | 2        | 2         | 3         |
| 1.152351   | 2          | 1.108872   | 2          | 1574.607    | 1        | 2         | 3         |
| 0.877033   | 1          | 0.908807   | 1          | 330.7377    | 2        | 2         | 3         |
| 1.750395   | 2          | 1.503806   | 2          | 759.5412    | 1        | 2         | 3         |
| 2.361581   | 2          | 1.904497   | 2          | 234.1133    | 2        | 1         | 3         |
| 2.930158   | 2          | 1.680812   | 2          | 3935.508    | 1        | 1         | 3         |
| 2.317685   | 2          | 1.313896   | 2          | 12547.59    | 1        | 2         | 3         |
| 1.834876   | 2          | 8.361808   | 2          | 2725.383    | 1        | 2         | 3         |
| 1.134872   | 2          | 1.096589   | 2          | 190.5273    | 2        | 2         | 2.666667  |
| 1.580153   | 2          | 2.002899   | 2          | 1603.28     | 1        | 2         | 6         |
| 0.848864   | 1          | 2.018748   | 2          | 296.0043    | 2        | 2         | 5.666667  |
| 0.945938   | 1          | 1.368339   | 2          | 72.27924    | 2        | 2         | 4.666667  |
| 1.869166   | 2          | 1.583949   | 2          | 672.4546    | 1        | 1         | 4.333333  |
| 2.621346   | 2          | 1.347671   | 2          | 1864.938    | 1        | 1         | 4         |
| 2.678534   | 2          | 1.937136   | 2          | 199.9708    | 2        | 2         | 4         |

|          |   |          |   |          |   |   |          |
|----------|---|----------|---|----------|---|---|----------|
| 1.360629 | 2 | 1.820455 | 2 | 606.4439 | 2 | 2 | 3.666667 |
| 2.454041 | 2 | 0.79534  | 1 | 349.0069 | 2 | 2 | 3.666667 |
| 2.636474 | 2 | 1.762919 | 2 | 229.5642 | 2 | 2 | 3        |
| 4.495871 | 2 | 2.251966 | 2 | 388.2238 | 2 | 2 | 3        |
| 2.500939 | 2 | 2.441038 | 2 | 280.3419 | 2 | 2 | 3        |
| 3.209328 | 2 | 0.908807 | 1 | 345.4713 | 2 | 2 | 3        |
| 4.721692 | 2 | 1.292627 | 2 | 230.7768 | 2 | 2 | 3        |
| 3.086847 | 2 | 1.892393 | 2 | 148.6877 | 2 | 1 | 3        |
| 4.575585 | 2 | 2.325829 | 2 | 319.1243 | 2 | 2 | 3        |
| 3.781109 | 2 | 1.726377 | 2 | 201.9875 | 2 | 2 | 5        |
| 3.284831 | 2 | 1.385472 | 2 | 1000.254 | 1 | 1 | 5        |
| 2.447657 | 2 | 4.354766 | 2 | 131.3567 | 2 | 2 | 3.666667 |
| 2.904989 | 2 | 1.099643 | 2 | 424.2483 | 2 | 2 | 3.666667 |
| 4.261167 | 2 | 2.778612 | 2 | 712.5185 | 1 | 1 | 3.666667 |
| 1.295273 | 2 | 1.968222 | 2 | 605.2538 | 2 | 2 | 3.666667 |
| 2.929903 | 2 | 1.047264 | 2 | 210.3815 | 2 | 2 | 3.333333 |
| 1.587441 | 2 | 1.782336 | 2 | 188.0316 | 2 | 1 | 3.333333 |
| 1.750395 | 2 | 1.503806 | 2 | 188.6976 | 2 | 2 | 3.333333 |
| 2.077444 | 2 | 1.938187 | 2 | 52.30441 | 2 | 2 | 3.333333 |
| 3.217461 | 2 | 1.210176 | 2 | 223.1928 | 2 | 2 | 3        |
| 1.294921 | 2 | 1.390278 | 2 | 753.3435 | 1 | 2 | 3        |
| 4.105044 | 2 | 1.049844 | 2 | 3901.296 | 1 | 2 | 3        |
| 3.277051 | 2 | 1.709904 | 2 | 222.5869 | 2 | 2 | 4        |
| 2.467715 | 2 | 1.16127  | 2 | 1126.678 | 1 | 2 | 3.666667 |
| 3.1927   | 2 | 1.456972 | 2 | 1682.093 | 1 | 1 | 3.666667 |
| 4.593696 | 2 | 2.064199 | 2 | 1886.05  | 1 | 2 | 3        |
| 4.688638 | 2 | 1.515807 | 2 | 440.3528 | 2 | 2 | 3        |
